1 **Short Title:** NIP2;1 lactic acid efflux during low oxygen stress

2 \*Author to whom correspondence should be sent: Daniel M. Roberts, e-mail: [drobot2@utk.edu](mailto:drobot2@utk.edu)

3 BCMB Dept., The University of Tennessee, Knoxville, TN, USA Phone: 1-865-974-4070, Fax:

4 1-865-974-6306,

5

6

## 7 **The *Arabidopsis thaliana* NIP2;1 Lactic Acid Channel promotes Plant** 8 **Survival Under Low Oxygen Stress**

9

10 Zachary Beamer<sup>1</sup>, Pratyush Routray<sup>1,3\*</sup>, Won-Gyu Choi<sup>2</sup>, Margaret K. Spangler<sup>1</sup>, Ansul  
11 Lokdarshi<sup>1</sup>, and Daniel M. Roberts<sup>1\*</sup>

12

13 <sup>1</sup>Department of Biochemistry and Cellular, and Molecular Biology, the University of Tennessee,  
14 Knoxville, TN 37996; <sup>2</sup>Department of Biochemistry and Molecular Biology, The University of  
15 Nevada, Reno, NV 89557.

16 <sup>3</sup>Present address: Boyce Thompson Institute, Ithaca, New York 14853, USA.

17

18 **One-sentence Summary:** The NIP2;1 lactic acid permease is necessary for an optimum  
19 response to low oxygen stress through the release of lactate from roots during hypoxia stress.

20 **Author Contributions** **Z.B.**, organized and executed the majority of the experiments, and  
21 together with P.R. wrote the manuscript; **P.R.**, co-corresponding senior author who directed in  
22 the design and supervision of the experiments, generated the complementation lines, conducted  
23 experiments on phenotype and was involved in analysing the data and organizing the  
24 manuscript; **W.G.C.**, initiated the early work, generated and characterized the promoter-GUS  
25 lines, and performed early analyses of the *nip2;1* T-DNA line; **M.S.**, undergraduate research  
26 student who assisted in phenotype survival analyses; **A.L.**, assisted in localization experiments  
27 as well as the QY<sub>max</sub> measurements; **D.M.R.**, supervisor of the project, obtained funding for the  
28 work, and was involved in the design of experiments, analysis and interpretation of the data,  
29 and co-edited the manuscript with PR. DMR agrees to serve as the contact, communication,  
30 and source for materials emerging from this project.

31 **Funding Information:** This work was supported by National Science Foundation Grant MCB-  
32 1121465 to DMR.

33 \*Corresponding authors email [drobert2@utk.edu](mailto:drobert2@utk.edu), and [pr474@cornell.edu](mailto:pr474@cornell.edu) .

34

35

36 **Abstract**

37 Under anaerobic stress *Arabidopsis thaliana* induces the expression of a collection of core  
38 hypoxia genes that encode proteins associated with an adaptive response. Included in these  
39 core hypoxia genes is *NIP2;1*, which encodes a member of the “Nodulin-like Intrinsic Protein”  
40 (NIP) subgroup of the aquaporin superfamily of membrane channel proteins. Under normal  
41 growth, *NIP2;1* expression is limited to the “anoxia core” region of the root stele, but shows  
42 substantial induction in response to low oxygen stress (as high as 1000-fold by 2-4 hr of hypoxia  
43 challenge), and accumulates in all root tissues. During hypoxia, *NIP2;1-GFP*, accumulates on  
44 the cell surface by 2 hr and then is distributed between the cell surface and internal membranes  
45 during sustained hypoxia, and remains elevated in root tissues through 4 hrs of reoxygenation  
46 recovery. T-DNA insertional mutant *nip2;1* plants show elevation of lactic acid within root  
47 tissues, and a reduced efflux of lactic acid and acidification of the external medium. Together  
48 with previous biochemical evidence demonstrating that NIP2;1 has lactic acid permease activity,  
49 the present work supports the hypothesis that the protein facilitates the release of cellular  
50 lactate to the rhizosphere to prevent lactic acid toxicity. In support of this, *nip2;1* plants show  
51 poorer survival to argon-induced hypoxia stress. *Nip2;1* mutant plants also show elevated  
52 expression of ethanolic fermentation transcripts, as well as reduced expression the lactate  
53 metabolic enzyme GOX3, suggesting that the altered efflux of lactate through NIP2;1 regulates  
54 other pyruvate and lactate metabolism pathways.

55

## 56 **Introduction**

57 As obligate aerobes, land plants require a continuous supply of oxygen to support  
58 energy demand. Oxygen deprivation stress from flooding or poor soil aeration depresses  
59 cellular respiration leading to an energy crisis that triggers a variety of genetic, metabolic, and  
60 developmental adaptation strategies (Voesenek and Bailey-Serres, 2013, 2015). In *Arabidopsis*,  
61 low oxygen stress triggers the preferential transcription and translation of a collection of “core”  
62 hypoxia-induced genes that encode glycolytic/fermentation enzymes, other metabolic proteins,  
63 and various signal transduction proteins and transcription factors involved in the adaptive  
64 response (Mustroph et al., 2009; Mustroph et al., 2010). Among the hypoxia-induced core  
65 response transcripts is an aquaporin-like membrane channel protein, Nodulin Intrinsic Protein  
66 2;1 (Choi and Roberts, 2007).

67 “Nodulin 26-like” Intrinsic Proteins (NIPs) are a terrestrial plant-specific subfamily of the  
68 aquaporin-superfamily that show structural and functional homology to the soybean root nodule-  
69 specific protein nodulin 26 (Roberts and Routray, 2017). NIPs possess the canonical aquaporin  
70 “hourglass” fold, but have diverged as multifunctional transporters of a wide variety of substrates  
71 including glycerol, ammonia, and a variety of essential as well as boric acid, silicic acid, and  
72 toxic metalloid hydroxides (Roberts and Routray, 2017; Pommerrenig et al., 2020). Based on  
73 structural modelling, NIPs can be segregated into three “pore families” that have conserved  
74 amino acids within their aromatic-arginine (ar/R) selectivity filters (Roberts and Routray, 2017).  
75 NIP2;1, along with NIP1;1, NIP1;2, NIP3;1, NIP4;1 and NIP4;2, belongs to the *Arabidopsis* NIP I  
76 subgroup (Johanson et al., 2001; Routray and Roberts, 2017). NIP I proteins have an ar/R  
77 amino acid composition similar to nodulin 26 (Wallace and Roberts, 2004), and show a transport  
78 selectivity for water, glycerol, and ammonia as natural substrates (Roberts and Routray, 2017),  
79 as well as the ability to be permeated by toxic metalloids (e.g., arsenite and antimonite) (Kamiya  
80 and Fujiwara, 2009; Kamiya et al., 2009; Xu et al., 2015). Biochemical analysis of NIP2;1 in  
81 *Xenopus* oocytes showed that it lacks the typical NIP I transport properties and is impermeable

82 to classical NIP substrates (Choi and Roberts, 2007). Instead, NIP2;1 shows pH-dependent  
83 transport of lactic acid (Choi and Roberts, 2007).

84 Lactic acid is the end product of lactate fermentation, one the fermentative pathways  
85 employed by plants to sustain energy production under oxygen limiting conditions and other  
86 stress conditions in which respiration is repressed (Drew, 1997; Gibbs and Greenway, 2003).  
87 Accumulation of lactic acid increases the acid load in the cytosol, and is among the factors that  
88 contribute to the cellular acidification observed during low oxygen stress (Davies et al., 1974;  
89 Roberts et al., 1984; Felle, 2005). Hypoxia-induced fermentation is accompanied by the  
90 acquisition of the ability of plant roots to efflux lactic acid to the rhizosphere (Xia and Saglio,  
91 1992; Rivoal and Hanson, 1993; Xia and Roberts, 1994; Dolferus et al., 2008). In maize root  
92 tips, this lactic acid efflux mechanism is correlated with reduced susceptibility to low oxygen  
93 stress from acclimation, it is proposed to be an adaptive mechanism to reduce cytosolic  
94 acidification or other toxic effects of cellular lactic acid/lactate accumulation (Xia and Saglio,  
95 1992; Xia and Roberts, 1994).

96 The previous finding that NIP2;1 is selectively permeable to lactic acid upon expression  
97 in oocytes, together with its identification as a core-hypoxia gene product, has led to the  
98 hypothesis that it mediates the efflux and/or compartmentation of lactic acid during the  
99 Arabidopsis response to low oxygen stress (Choi and Roberts, 2007). However, this has yet to  
100 be investigated in planta. The objective of this research was to test this hypothetical function of  
101 NIP2;1 during the Arabidopsis hypoxia response. In this study, it shown that a T-DNA insertional  
102 *nip2;1* mutant exhibits poor tolerance of low oxygen stress compared to wild-type. Further, it is  
103 shown that the efflux of lactate from hypoxia-stressed roots to the media from the roots requires  
104 NIP2;1 expression. NIP2;1 localization was observed to vary between internal membranes and  
105 the plasma membrane during the course of hypoxia and recovery, consistent with previous  
106 observations suggesting dual localization of the protein. Lastly, evidence is presented that the  
107 transcripts encoding fermentation and pyruvate/alanine metabolism enzymes are altered in

108 *nip2;1* mutant plants compared to wild-type plants. Overall, the data support a role for NIP2;1 as  
109 a lactic acid efflux channel, and suggest that this activity could help control the expression of  
110 enzymes that metabolize pyruvate during the Arabidopsis hypoxia response.

## 111 **Results**

112 ***NIP2;1* expression is induced early during hypoxia primarily in root tissue** Hypoxia  
113 treatment of two week old Arabidopsis seedlings resulted in a rapid increase in *NIP2;1*  
114 expression in root tissues with Q-PCR analysis revealing a >1000-fold increase in *NIP2;1*  
115 transcript levels within two hours after the onset of anaerobiosis (Fig. 1A). *NIP2;1* transcript  
116 levels then showed a sharp decline by 12 hr but still remained over 100-fold elevated relative to  
117 normoxic controls before leveling off at 24 hr (Fig. 1A). While *NIP2;1* is predominantly a root  
118 transcript, hypoxia also induced *NIP2;1* expression in shoot tissues, but with a lower overall  
119 expression (40-fold relative to basal levels) compared to roots (Fig. 1A inset). In addition, the  
120 time course of accumulation in shoots was delayed when compared to root tissues and  
121 expression did not peak until 12 hr treatment.

122 Similar patterns of *AtNIP2;1* expression were observed with two week old *AtNIP2;1*  
123 *promoter::GUS* fusion plants subjected to the same oxygen deprivation regime (Fig 1B).  
124 Analysis of the cellular localization of GUS staining under normoxic conditions showed that  
125 expression is principally limited to roots with little staining detected in shoot tissues (Fig. 1B).  
126 Cross-sections of unstressed (normoxic) roots showed that GUS staining was principally  
127 observed in the cells of the stele (pericycle, phloem and procambium,) with little or no GUS  
128 signal apparent in endodermal, cortical and epidermal cells (Supplemental Fig. 1, Fig. 1B). At 4  
129 hr after the induction of hypoxia, root tissues showed an increase in intensity of the GUS  
130 staining in the stele as well as the appearance of the GUS signal in the cortex, epidermis and  
131 root hairs (Fig. 1B). Similar to the Q-PCR result, this staining peaked at 4 hr post hypoxic  
132 treatment and then decreased by 12 hr post treatment (Fig. 1B), although the expression at  
133 these later time points was still much higher than the basal expression in the unstressed roots

134 (Fig. 1B). In comparison to roots, increases in GUS expression in shoots were less acute and  
135 appeared more slowly and the expression was mainly restricted to the vascular tissues of  
136 leaves (Fig. 1C).

137 ***NIP2;1* enhances plant survival under low oxygen conditions** Core hypoxia-response gene  
138 loss-of-function mutants generally result in reduced survival or increased sensitivity to low  
139 oxygen stress (Ismond et al., 2003; Kursteiner et al., 2003; Licausi et al., 2010; Giuntoli et al.,  
140 2014; Sorenson and Bailey-Serres, 2014; Lokdarshi et al., 2016). To investigate whether *NIP2;1*  
141 is necessary for hypoxia stress survival, a T-DNA insertion mutant (WiscDsLox233237\_22K;  
142 referred to here as *nip2;1*) line was studied. The *nip2;1* line contains a T-DNA insertion within  
143 the promoter region (-30) between a cluster of Anaerobic Response Elements and the  
144 transcriptional start site (Fig. 2A). Consistent with the position of this insertion, hypoxia  
145 treatment (4 hr) of *nip2;1* plants resulted in poor expression of *NIP2;1* compared to wild type  
146 plants (Fig. 2B). Assay of *NIP2;1* protein levels by Western blot showed no detectable *NIP2;1*  
147 protein in root tissues of *nip2;1* mutant plants after 6 hours of hypoxia compared to wild type  
148 plants (Fig. 2C).

149 To determine the effects of low oxygen stress on *nip2;1* plants, their growth and survival  
150 under normoxic and hypoxic conditions were compared (Fig. 3). While wild type and *nip2;1*  
151 plants showed little difference in growth under normoxic conditions (Supplemental Fig 2), *nip2;1*  
152 plants showed higher sensitivity to hypoxia treatment (Fig. 3). After exposure to argon gas-  
153 induced hypoxia, followed by transfer back to normoxic conditions, *nip2;1* seedlings exhibited a  
154 higher incidence of leaf chlorosis within 24 hours after the hypoxia treatment (Fig. 3A).  
155 Comparison of the overall survival frequency of wild type and *nip2;1* seedlings showed that the  
156 mutant exhibited significantly poorer survival to hypoxic stress (Fig. 3C).

157 To confirm that the increased sensitivity of *nip2;1* plants to hypoxia is result of the loss of  
158 *NIP2;1* gene, complementation lines containing a *NIP2;1pro::NIP2;1-GFP* transgene in the  
159 *nip2;1* background were analyzed (Fig. 3C and Supplemental Fig. 2). The complementation

160 lines showed enhanced tolerance to hypoxia challenge compared to *nip2;1* plants,  
161 (Supplemental Figure 2), and were not statistically different to wild type plants with respect to  
162 survival frequency (Fig. 3C).

163 The sensitivity of the *nip2;1* mutant to hypoxia was further assessed by measuring the  
164 chlorophyll fluorescence properties and calculating the maximum potential quantum efficiency  
165 ( $Q_{max}$  or  $F_v/F_m$ ) of photosystem (PS) II of *nip2;1* and WT seedlings under normal and low oxygen  
166 stress conditions. Chlorophyll fluorescence measurements is a common technique used to  
167 assess the photosynthetic efficiency of PS II which is an index of the susceptibility of plants to  
168 different environmental stressors (Murchie and Lawson, 2013). Under normoxic conditions, WT  
169 and *nip2;1* seedlings were not significantly different with  $F_v/F_m$  values that fell within the  
170 optimum range (0.78 - 0.8, Murchie and Lawson, 2013). This suggests that the lack of *NIP2;1*  
171 expression in the mutant line does not exhibit any detectable adverse effect on this parameter  
172 under standard growth conditions. However, upon hypoxia treatment both WT and *nip2;1*  
173 showed a steep reduction in photosynthetic efficiency with the  $F_v/F_m$  ratio declining to below 0.6  
174 within four hours of the recovery period (Fig. 3B). At all time points, the  $F_v/F_m$  ratio is lower for  
175 *nip2;1* than wild type plants. At later time points the quantum efficiency of PS II starts to recover  
176 (Fig. 3C), but the *nip2;1*  $F_v/F_m$  ratio remains significantly lower than wild type after 24 hours of  
177 recovery.

178 Taken together, the *nip2;1* phenotype data indicate that *NIP2;1* is hypoxia core response  
179 protein that participates in the hypoxia adaptation response, and that reduction in expression of  
180 *NIP2;1* lowers the ability of Arabidopsis to survive this stress.

181 **NIP2;1 is expressed on the plasma membrane as well as on internal membranes during**  
182 **hypoxia and reoxygenation recovery** To investigate the dynamics of protein expression and  
183 the subcellular localization of NIP2;1, the *NIP2;1pro::NIP2;1-GFP* complementation lines were  
184 analyzed. Similar to wild type *NIP2;1*, Q-PCR analysis shows that the *NIP2;1-GFP* transgene  
185 transcript is acutely induced by hypoxia, with a peak at 4 hr followed by a decline (Fig. 4C). As



186 has been documented with other core hypoxia transcripts(Branco-Price et al., 2008),  
187 reoxygenation results in a rapid decline of the transcript to basal levels. Analysis of NIP2;1-GFP  
188 protein accumulation during hypoxia and re-oxygenation was done by using epifluorescence  
189 microscopy and Western blot analysis at different time points of hypoxia stress and  
190 reoxygenation recovery (Fig. 4A and B). The GFP signal first appeared within two hours of the  
191 onset of hypoxia (Fig. 4A and B), and increased as hypoxia proceeded. Return to normal  
192 oxygen conditions resulted in a substantial increase in the fluorescent intensity at 30 min (Fig.  
193 4A) with Western blot protein levels peaking at 2 hr reoxygenation (Fig. 4B and C). While  
194 transcript levels decline rapidly to non-detectable levels (Fig. 4C), the fluorescent intensity and  
195 Western blot analyses indicate the persistence of the NIP2;1 protein for hours after return to  
196 normal oxygen conditions (Fig. 4A and B).

197 Different NIP proteins show varied subcellular localization, ranging from polarized  
198 plasma membrane localization for the root boric acid permease NIP5;1(Wang et al., 2017) to  
199 specific localization on subcellular organelles such as the soybean symbiosome membrane  
200 protein, nodulin 26 (Weaver et al., 1991). Previous work with NIP2;1 expression in  
201 heterologous systems with strong, constitutive non-native promoters suggested localization to  
202 either the plasma membrane (Choi and Roberts, 2007) or internal membranes (Mizutani et al.,  
203 2006). To investigate its subcellular localization under native conditions during hypoxia and  
204 reoxygenation, confocal microscopy of the roots of *NIP2;1pro::NIP2;1-GFP* seedlings was done  
205 (Fig. 5 and Supplemental Fig. 3).

206 Analysis of NIP2;1-GFP at 2 hr after the onset of hypoxia revealed accumulation within  
207 the elongation zone of the root with significant co-localization at the plasma membrane with the  
208 marker FM4-64 (Supplemental Fig. 3, Fig. 5), although some staining within internal structures  
209 is also apparent (Supplemental Fig. 3B). As hypoxia proceeds and more protein accumulates,  
210 the majority of NIP2;1-GFP signal appears to accumulate internally (Fig. 5, 6 hr time point).

211 Following 1 hr of reoxygenation, the localization of NIP2;1 on the surface appears to increase,  
212 although internal localization is still apparent (Fig. 5).

213 **NIP2;1 participates in lactate efflux and media acidification during hypoxia** Based on the  
214 specificity of NIP2;1 as a lactic acid permease based on biochemical analyses (Choi and  
215 Roberts, 2007), its localization in part to the surface of root cells, and the observation that  
216 hypoxia triggers release of lactate from roots into the external media (Xia and Saglio, 1992;  
217 Dolferus et al., 2008; Engqvist et al., 2015), it is hypothesized that NIP2;1 may participate in the  
218 excretion of lactate during the low oxygen stress response. To test this hypothesis, the pH and  
219 concentration of lactic acid within the media of wild-type and *nip2;1* seedlings challenged with  
220 hypoxia were examined. To compare the hypoxia-induced acidification of the external medium,  
221 10 d-old wild-type and *nip2;1* seedlings were subjected to argon gas treatment on media  
222 containing the pH sensitive dye, bromocresol purple (Fig. 6A). Upon transfer from normoxic to  
223 hypoxic conditions, wild type plants show significant acidification of the media surrounding the  
224 roots, while *nip2;1* plants show no difference in bromocresol purple staining between normoxic  
225 and hypoxic conditions (Fig 6A).

226 In follow up analyses, the lactate levels released into the media by the roots of hypoxia-  
227 challenged wild type and *nip2;1* seedlings were compared. Wild type roots excrete significantly  
228 higher amounts of lactate into the environment compared with the roots of *nip2;1* plants (Fig  
229 6B). The levels of lactate that accumulate within wild type and *nip2;1* roots tissues under  
230 hypoxic conditions were also compared (Fig. 6C). During a hypoxia time course, lactate levels  
231 increase in both wild type and *nip2;1* roots, but at all time points, including normoxia, *nip2;1*  
232 plants accumulate significantly higher levels of this metabolite (Fig. 6C). The results, combined  
233 with previous functional studies (Choi and Roberts, 2007), suggest that NIP2;1 is an  
234 endogenous lactic acid transporting channel protein that participates in lactate transport,

235 homeostasis, and efflux during low oxygen stress in Arabidopsis roots, and that this activity is  
236 necessary to release lactate produced during anaerobic fermentation within the root.

237 **The loss of *NIP2;1* function affects the expression of pyruvate and lactate metabolic**  
238 **enzymes** Anaerobic metabolism of pyruvate during oxygen limitation in plants occurs through  
239 three conserved pathways: lactic acid fermentation, ethanolic fermentation and alanine  
240 synthesis (Fig. 7). While all three pathways use pyruvate as a substrate, lactic acid and  
241 ethanolic fermentation regenerate NAD<sup>+</sup>, whereas alanine synthesis serves as a mechanism to  
242 store nitrogen and carbon for reoxygenation (Sato et al., 2002; Ricoult et al., 2005). Genes that  
243 encode enzymes in these pathways (such as *ADH*, *PDC*, *LDH*, and *AlaAT*) are among the “core  
244 hypoxia response” proteins that are induced in Arabidopsis roots during hypoxia (Mustroph et  
245 al., 2009; Lee et al., 2011; Mustroph et al., 2014). Conversely, L-lactate produced via LDH is  
246 proposed to be converted back to pyruvate in peroxisomes (Fig. 7A) by the root-specific  
247 glycolate oxidase 3 enzyme (Engqvist et al., 2015). Unlike other members of this enzyme family  
248 that participate in the metabolism of glycolate, GOX3 is specific for L-lactate and utilizes oxygen  
249 as an electron acceptor to oxidize lactate, producing hydrogen peroxide and pyruvate as end  
250 products (Engqvist et al., 2015). *GOX3* is not a hypoxia-induced transcript and is rather  
251 proposed to regulate the concentration of lactate in a coordinate fashion with LDH under aerobic  
252 conditions (Engqvist et al., 2015; Maurino and Engqvist, 2015).

253 Q-PCR analysis shows that hypoxia response transcripts encoding fermentation  
254 enzymes (*ADH1*, *PDC1*, *LDH*, and *AlaAT1*) show induction in root tissues during 4 hr of argon  
255 gas (Fig. 7B). However, closer analysis of wild type and *nip2;1* roots show different levels of  
256 selective transcripts. While *LDH* transcript levels show no statistical differences between wild  
257 type and *nip2;1* roots, *ADH1*, *PDC1*, and *AlaAT1* are substantially elevated in *nip2;1* compared  
258 to wild type plants (Fig. 7C). Conversely, *GOX3*, which is expressed at the same level under  
259 normal and hypoxic conditions in wild type roots, is substantially reduced in hypoxic *nip2;1*  
260 roots. Overall, the data suggest that the alterations in lactic acid homeostasis within the *nip2;1*

261 mutant have a selective effect on the metabolism of pyruvate and lactate metabolizing enzyme  
262 expression, with transcripts encoding fermentation enzymes in ethanol and alanine producing  
263 pathways enhanced, whereas the transcript that encodes the lactic acid metabolizing enzyme  
264 GOX3 is suppressed.

## 265 **Discussion**

### 266 **NIP2;1-mediated lactic acid efflux promotes Arabidopsis survival during low oxygen**

267 **stress** In response to low oxygen conditions resulting from flooding or submergence stress,  
268 plants switch to anaerobic fermentation pathways to maintain glycolytic flux and energy  
269 production. In Arabidopsis, enzymes of ethanolic (ADH and PDC) and lactic acid (LDH)  
270 fermentation pathways are necessary for optimal survival to low oxygen stress(Ellis et al., 1999;  
271 Ismond et al., 2003; Kursteiner et al., 2003; Dolferus et al., 2008). The levels of lactate increase  
272 14-fold within the root during the first two hours of hypoxia challenge (Mustroph et al., 2014)  
273 suggesting that lactic acid fermentation is induced during the initial stages of hypoxia. As  
274 lactate accumulates, hypoxia-stressed Arabidopsis plants (Dolferus et al., 2008), similar to other  
275 plant lineages (Xia and Saglio, 1992; Rivoal and Hanson, 1993; Xia and Roberts, 1994), efflux  
276 lactate from the roots to the external media/rhizosphere during low oxygen stress. Lactate efflux  
277 mechanisms in plant roots may assist in mitigating cellular acidification or other toxic effects of  
278 lactate accumulation during anaerobic stress (Xia and Roberts, 1994; Greenway and Gibbs,  
279 2003).

280 To alleviate potential cellular acidification from lactate fermentation, the pathways for the  
281 efflux of lactic acid must transport either the protonated form (lactic acid) or co-transport lactate  
282 with a proton [reviewed in (Greenway and Gibbs, 2003)]. In the case of animal cells, lactate is  
283 effluxed or taken up by members of the SLC16 subgroup of the major facilitator superfamily  
284 known as Monocarboxylate Transporters or MCTs (Counillon et al., 2016; Sun et al., 2017).  
285 These proteins are symporters that co-transport lactate with H<sup>+</sup> in a bidirectional fashion. They

286 participate in the efflux of excess lactic acid during anaerobic fermentation, and also serve as an  
287 uptake mechanism for lactate from the serum for further metabolism (Sun et al., 2017). Land  
288 plants lack members of the SLC16/MCT transporter family, and the molecular identity of the  
289 transporters or channels that mediate the efflux of lactate/lactic acid produced during anaerobic  
290 fermentation have remained unclear. In this study, cellular, and genetic evidence is provided  
291 that, together with previous protein functional analyses (Choi and Roberts, 2007), indicate that  
292 the aquaporin-like NIP2;1 assists in mediating lactic acid efflux from Arabidopsis roots.

293 Nodulin Intrinsic Proteins are a plant-specific subgroup of the aquaporin superfamily that  
294 have diversified structurally and functionally during land plant evolution, and which have  
295 acquired solute transport activities beyond canonical aquaporin water transport (Roberts and  
296 Routray, 2017). NIP transport functions range from glycerol to ammonia to metalloids  
297 metabolites such as boric and silicic acid. However, biophysical and biochemical analysis of  
298 Arabidopsis NIP2;1 in *Xenopus* oocytes (Choi and Roberts, 2007) indicate that it is an outlier  
299 from other classical NIP proteins and is impermeable to water and all traditional NIP solute  
300 substrates, and instead shows specific bidirectional permeability to protonated lactic acid.  
301 Several observations in the present work provide strong support that lactic acid transport and  
302 efflux is the biological function of NIP2;1. First, the expression of NIP2;1 in response to hypoxia  
303 coincides with the appearance of lactate in the external medium; second, genetic mutation of  
304 the NIP2;1 via T-DNA insertion results in the reduction of lactate efflux from hypoxic roots into  
305 the external medium and a concomitant increase in the accumulation of lactate within root  
306 tissue; and third, mutant *nip2;1* plants show reduction in the acidification of the media  
307 surrounding hypoxic roots.

308 Mutant *nip2;1* plants show poorer survival to argon-induced low oxygen stress compared  
309 to wild type plants, presumably because of the over accumulation of toxic levels of lactic acid  
310 due to a reduced ability to efflux this end product from roots. As noted above, cytosolic lactate  
311 generation would increase the acid load of the cytosol that could contribute to acidosis (Davies

312 et al., 1974; Roberts et al., 1984; Felle, 2005). Additionally, the accumulation of lactate could  
313 also contribute to reduced glycolytic flux by affecting NAD<sup>+</sup> regeneration by altering the  
314 equilibrium of the LDH reaction, or potentially through product feedback inhibition mechanisms.  
315 For example, recent studies in yeast and mammals show that over accumulation of lactate  
316 leads to the production of the toxic side product 2-phospholactate catalyzed by pyruvate kinase.  
317 This side product of lactate blocks the production of fructose-2-6 bisphosphate, leading to the  
318 inhibition of the key glycolytic enzyme phosphofructokinase-1 (Collard et al., 2016). The  
319 production of similar toxic lactate metabolites side products could conceivably occur in plant  
320 tissues as well.

321 **NIP2;1 expression during normoxia, hypoxia stress and recovery** NIP2;1 expression is  
322 almost completely limited to root tissues with a precise pattern of transcript and protein  
323 expression during normoxic, hypoxic, and reoxygenation conditions. Under normoxic conditions,  
324 *NIP2;1* promoter activity is restricted to cells within the stele of the mature root (Supplemental  
325 Fig. 1). The cells of the stele are hypoxic even under well aerated growth conditions due to the  
326 low rate of lateral oxygen diffusion across the mature differentiated root (Armstrong et al., 1994;  
327 Gibbs and Greenway, 2003). "Anoxic cores" in the root stele are proposed to aid in hypoxia  
328 sensing and acclimation, potentially by the communication of low oxygen or energy signals  
329 (ethylene, metabolites, low pH, and Ca<sup>2+</sup>) between hypoxic and well-aerated cells (Armstrong et  
330 al., 2019). The roots of *nip2;1* mutants show increased accumulation of lactate under normoxic  
331 conditions (Fig. 6C). This suggests that LDH is active in anoxic core tissues, even under  
332 aerobic conditions, and that NIP2;1 basal expression is necessary for maintaining low lactate  
333 accumulation.

334 *NIP2;1* Q-PCR and GUS data show the characteristics of a core hypoxia response  
335 transcript, with acute induction of *NIP2;1* expression in roots within 1 hr of the initiation of  
336 hypoxia stress, followed by a peak and eventual decline to a reduced but elevated steady state  
337 level that is sustained during hypoxia. Interestingly, examination of the cell-specific transcriptome

338 atlas based on the work of (Mustroph et al., 2009) shows that the expression *NIP2;1* during  
339 hypoxia parallels the expression of the two lactate metabolizing enzyme transcripts, *LDH* and  
340 *GOX3* (Supplemental Figure 4). All three transcripts are predominantly, if not exclusively,  
341 expressed in root tissue (Dolferus et al., 2008; Mustroph et al., 2014; Engqvist et al., 2015), and  
342 accumulate to the highest levels in the root cortex, as well as to high levels within the epidermal  
343 and vascular tissues, but are absent or poorly expression in leaf tissues. The root-predominant  
344 expression pattern of *NIP2;1*, *LDH1* and *GOX3* is consistent with the distinct lactate metabolic  
345 properties and responses of roots and shoots to low oxygen stress (Ellis et al., 1999; Mustroph  
346 et al., 2014). Based on the model of (Engqvist et al., 2015), these three gene products are  
347 proposed to coordinate lactate homeostasis through its production (LDH), its recovery back to  
348 pyruvate (*GOX3*), and the excretion of lactate from the cell when it is overproduced during low  
349 oxygen stress (*NIP2;1*).

350         Similar to other hypoxia-induced genes (Branco-Price et al., 2008), reoxygenation  
351 results in suppression of *NIP2;1* mRNA expression and a return to low basal levels within two  
352 hours of recovery. In contrast, *NIP2;1* protein levels increase during early reoxygenation and  
353 remain elevated for several hours post recovery, suggesting that the activity of the protein is  
354 also required during recovery. In addition to excretion of lactic acid to the media, *Arabidopsis*  
355 can take up L-lactate from the media and metabolize it (Dolferus et al., 2008; Engqvist et al.,  
356 2015). Since *NIP2;1* mediates the bidirectional flux of lactic acid (Choi and Roberts, 2007), it  
357 could assist in the recovery of excreted lactic acid to trigger its metabolism to pyruvate and entry  
358 into the TCA cycle as part of the replenishment of TCA cycle intermediates that takes place  
359 during post-anoxic recovery (Branco-Price et al., 2008; Tsai et al., 2014; Yeung et al., 2019).

360 ***NIP2;1* localization during hypoxia stress and recovery** By using the complementation lines  
361 with a *NIP2;1-GFP* transgene under the native promoter, the localization of the protein during  
362 hypoxia stress and recovery was analysed. *NIP2;1-GFP* shows a strong colocalization with a

363 plasma membrane marker during early hypoxia when the protein starts to appear (2 hrs).  
364 During extended hypoxia (>6 hr) the NIP2;1 GFP signal becomes stronger, and with enhanced  
365 localization within endomembranes although expression on the cell surface is still observed.  
366 During recovery, dual localization is still observed, although plasma membrane localization  
367 appears to be prevalent. These observations indicate that the NIP2;1 is distributed to both  
368 surface and internal membranes, and can explain the potential conflicting reports of different  
369 subcellular localization (plasma membrane and ER) based on transient expression in  
370 Arabidopsis protoplasts under the CaMV promoter in earlier work (Mizutani et al., 2006; Choi  
371 and Roberts, 2007). Subsequent analysis of NIP2;1-GFP localization in transgenic Arabidopsis  
372 plant roots driven by a heterologous NIP5;1 promoter under aerobic conditions, also showed  
373 dual localization (Wang et al., 2017).

374         The trafficking of plant aquaporins to various target membranes through endocytic and  
375 redistribution pathways is regulated based on metabolic need and stress physiology [reviewed  
376 by (Chevalier and Chaumont, 2015; Takano et al., 2017)]. For example, PIP2;1 aquaporins are  
377 dynamically cycled between the internal membranes and the plasma membrane (Li et al.,  
378 2011), with regulation via phosphorylation (Boursiac et al., 2008; Prak et al., 2008) or other  
379 factors (Santoni, 2017; Takano et al., 2017) leading to preferential surface expression or  
380 internalization, which regulates the hydraulic conductivity of the cell. The dual localization of  
381 NIP2;1 could reflect a similar dynamic distribution and trafficking between internal membranes  
382 and the cell surface to regulate lactate efflux. In the case of some plant (Prak et al., 2008) as  
383 well as mammalian (Noda and Sasaki, 2006) aquaporins, preferential trafficking to the plasma  
384 membrane is controlled by the phosphorylation of serine within the cytosolic carboxyl terminal  
385 domain. Proteins of the NIP I subgroup are phosphorylated on a homologous serine within the  
386 carboxyl terminal domain (Wallace et al., 2006; Santoni, 2017), which is catalyzed by  
387 CDPK/CPK kinases (Weaver et al., 1991). This phosphorylation motif is conserved in NIP2;1  
388 (Ser 278). In addition, phosphoproteomic analysis reveals that NIP2;1 is also phosphorylated in



389 the N-terminal domain at Ser 5 by an unidentified protein kinase (Vialaret et al., 2014). Whether  
390 phosphorylation, or other regulatory factors, control trafficking or distribution of NIP2;1 in  
391 response to hypoxia or recovery signals to regulate lactic efflux or uptake remains to be  
392 investigated.

393 **Lactic acid and ethanolic fermentation pathways** Ethanolic fermentation through the PDC-  
394 catalyzed decarboxylation of pyruvate followed by subsequent production of ethanol from  
395 acetaldehyde via ADH is proposed to be the major anaerobic catabolism pathway (Gibbs and  
396 Greenway, 2003). However, lactic acid fermentation is also carried out in most plant species  
397 (Gibbs and Greenway, 2003), and in many cases may precede, and regulate the transition to  
398 ethanolic fermentation. The reason for initial reliance on lactic acid fermentation during hypoxia  
399 prior to a shift to ethanolic fermentation is not clear (Gibbs and Greenway, 2003). However, this  
400 pathway, unlike ethanolic fermentation, could allow recovery of the fermentation end product.  
401 Additionally, lactate production via LDH occurs under aerobic conditions in response to other  
402 abiotic and biotic stresses that could affect energy metabolism (Dolferus et al., 2008; Maurino  
403 and Engqvist, 2015). In animal systems, the physiological role of lactate transcends serving as  
404 an end product for anaerobic glucose metabolism, and its larger role as a metabolic regulator  
405 has emerged, including G-protein signalling as well as transcriptional regulation through histone  
406 modification (Latham et al., 2012; Sun et al., 2017; Zhang et al., 2019).

407 The possibility of lactate as a signal in plant systems remains largely unexplored.  
408 Nevertheless, there is evidence that the balance between the two fermentation pathways is  
409 regulated. For example, in classical studies of maize root tips, plants subjected to hypoxia  
410 stress initially engage in lactic acid fermentation followed by a switch to primarily ethanolic  
411 fermentation that is proposed to be driven by cellular acidification by lactate accumulation or  
412 other means that results in subsequent pH-dependent activation of PDC [the “pH stat” model  
413 (Davies et al., 1974; Roberts et al., 1984)]. In the case of Arabidopsis, overexpression of *LDH*  
414 results in an increase in PDC activity and media efflux of lactate (Dolferus et al., 2008),

415 suggesting that increased lactic acid fermentation triggers the expression of ethanolic  
416 fermentation enzymes. Conversely, *adh1* null plants induce higher levels of lactic acid  
417 production to apparently compensate for reduced flux through the ethanolic fermentation  
418 pathway (Ismond et al., 2003). In *nip2;1* mutants, the accumulation of higher tissue lactate may  
419 produce an effect similar to *LDH1* overexpression. Higher transcript levels encoding enzymes  
420 within alternative pathways of the metabolism of pyruvate (e.g., *PDC1*, *ADH1* and *AlaAT1*) may  
421 be an adaptive response to the accumulation of lactic acid in *nip2;1* roots.

422         The reason for the selective reduction of *GOX3* inhibition in hypoxic *nip2;1* roots is less  
423 clear. As pointed out by Engqvist et al. (2015), the proposed role of this enzyme is to convert  
424 lactate back to pyruvate within the peroxisome which would serve to reduce lactic acid levels  
425 within the cell. Notably, however, this conversion occurs with the production of a reactive  
426 oxygen end product (hydrogen peroxide). ROS production is a major contributor to  
427 reoxygenation stress and is associated with poor tolerance to hypoxia and recovery (Yeung et  
428 al., 2019). If cytosolic lactate levels are elevated in *nip2;1* mutants, *GOX3* (which uses oxygen  
429 as a co-substrate) could trigger greater ROS production upon reoxygenation.

430 **Aquaporins as lactic acid channels in other plant and microbial systems** In addition to  
431 *Arabidopsis NIP2;1*, select aquaporins with lactic acid permeability and efflux function have  
432 been described in other systems. For example, the Lactobacillales, which produce large  
433 quantities of lactic acid through fermentation, possess isoforms of the glycerol facilitator  
434 encoded by the *GlpF1* and *GlpF4* that facilitate lactic acid efflux (Bienert et al., 2013). The  
435 human trematode pathogen, *Schistosoma mansoni*, which performs lactic acid fermentation  
436 during the pathogenic part of its life cycle, possesses a lactic acid permeable plasma membrane  
437 aquaporin *SmAQP* that is proposed to release this end product (Faghiri et al., 2010). More  
438 pertinent to the present study, recent work (Mateluna et al., 2018) has identified other NIP I  
439 proteins, *PruavNIP1;1* and *PrucxmNIP1;1*, that are induced during low oxygen stress in  
440 hypoxia-tolerant *Prunus* root stocks, and which are proposed to be lactic acid permeable

441 proteins based on yeast lactate auxotroph assays. These observations suggest that a subset of  
442 the NIP I family have evolved to functionally flux lactic acid. Since NIP2;1 retains the ar/R pore  
443 constriction properties of other lactic acid-impermeable NIP aquaglyceroporins, the structural  
444 alterations within the pore that confer the altered selectivity for lactic acid and the exclusion of  
445 other substrates include additional pore determinants besides the canonical selectivity filter that  
446 remain to be elucidated. Finally, whether NIP proteins are part of a larger network of  
447 transporters that coordinate directional lactate efflux and movement within root tissues, similar  
448 to NIP and BOR proteins in boric acid homeostasis (Takano et al., 2008), remains unknown.

449

## 450 **Materials and Methods**

451 **Plant growth conditions and stress treatments** *Arabidopsis thaliana* ecotype Columbia-0  
452 was used in all experiments. Seeds were sterilized and stratified at 4 °C for 2 days, and were  
453 germinated as in (Choi and Roberts, 2007). Seedlings were grown vertically on in Murashige-  
454 Skoog (MS) media supplemented with 1% (w/v) sucrose and 0.8% (w/v) Phyto-agar  
455 (plantMedia) with a long day (LD) cycle of 16 hours of light ( $100 \mu\text{mol m}^{-2} \text{s}^{-1}$ ) and 8 hours of  
456 dark (LD conditions). Hypoxia treatment was administered at the end of the light cycle by the  
457 argon-treatment protocol described by (Lokdarshi et al., 2016). For normoxic controls, seedlings  
458 were treated simultaneously under identical conditions except in the presence of air instead of  
459 argon gas. Phenotype analysis for hypoxia survival was conducted as described by Lokdarshi  
460 et al. (2016) with modifications. Briefly, seven days old seedlings were administered 8 hours of  
461 argon gas-induced hypoxia or air, and were returned to LD growth conditions. The survival  
462 frequency (seedling chlorosis) was scored three days after stress treatment.

463 **Photosynthetic efficiency measurement** The maximum quantum yield of photosystem II  
464 [ $\text{QY}_{\text{max}} = F_v / F_m$ ] was measured with a FluorCam 800MF instrument (Photon Systems  
465 Instruments) by the general method of (Murchie and Lawson, 2013). Seven-day old seedlings  
466 were administered 8 hr hypoxia, and  $\text{QY}_{\text{max}}$  was measured at different recovery time points

467 upon return to LD conditions. For the first time point (time=0), seedlings were removed from  
468 hypoxia and were subjected to a saturating pulse of  $1800 \mu\text{Ein m}^{-2}\text{s}^{-1}$  for 0.8 sec ( $F_m$ ). Variable  
469 fluorescence ( $F_v$ ) was calculated as the difference between  $F_o$  and  $F_m$  to calculate the maximum  
470 quantum yield [ $F_v/F_m$ ]. For subsequent measurements, seedlings were dark adapted for 2 min  
471 ( $F_o$ ) prior to application of the saturating pulse and conducting measurements.

472 **T-DNA Insertion Mutant *nip2;1* and complementation line** A sequence tagged T-DNA  
473 insertion line within the *NIP2;1* gene (WiscDsLox233237\_22k) from the WiscDs-Lox T-DNA  
474 collection (Woody et al., 2007) was obtained from Arabidopsis Biological Resource Center at  
475 the Ohio State University. The mutant, herein named *nip2;1*, was selected on MS media  
476 supplemented with 15  $\mu\text{g/mL}$  Basta. The genotype of mutant plants was assessed by a PCR-  
477 based genotyping protocol as described at (<http://signal.salk.edu/tdnaprimers.2.html>). For this  
478 purpose, genomic DNA was extracted from 2-wk old seedlings using the *Wizard* Genomic DNA  
479 purification kit (Promega) and was subjected to PCR analysis using two *AtNIP2;1* gene specific  
480 primers and the left border T-DNA primer (all primers used in this study are described in  
481 Supplemental Table 1). The precise site of T-DNA insertion was verified by a cloning of the  
482 PCR product into the pCR2.1-TOPO vector (Invitrogen) followed by automated DNA  
483 sequencing. All sequencing was performed at the University of Tennessee Molecular Biology  
484 Resource Facility. T4 homozygous mutant seedlings were used for all phenotyping and other  
485 analyses in this study.

486 For complementation of *nip2;1*, as well as to provide a mechanism for localization of a  
487 native protein construct by fluorescence microscopy, transgenic lines containing a transgene  
488 consisting of a *NIP2;1-GFP* translational fusion under the control of the *NIP2;1* promoter were  
489 generated in the *nip2;1* background. The promoter region of the *NIP2;1* gene (from the  
490 translational start site to a site 2000 bp upstream) was generated by PCR of Arabidopsis  
491 genomic DNA with gene specific primers with added *KpnI* and *AatII* restriction sites

492 (Supplemental Table 1) to facilitate insertion into the binary vector pKGW\_RedRoot\_OCSA  
493 (Niyikiza et al., 2020). The modified destination vector was named pKGW\_OCSA\_*NIP2;1Pro*.  
494 The *NIP2;1* coding sequence (CDS) was amplified from the cDNA prepared from 4 hr hypoxic  
495 Arabidopsis seedlings with gene-specific primers with *XbaI* and *EcoRI* sites (Supplemental  
496 Table 1) to facilitate cloning into the Gateway entry vector CD3-1822 (Wang et al., 2013) to  
497 generate a construct of encoding *NIP2;1* as an in-frame carboxyl-terminal fusion with GFP  
498 separated by a 3X Gly linker. The *NIP2;1-GFP* construct was then recombined into the  
499 pKGW\_OCSA\_*NIP2;1Pro* vector by using a gateway LR reaction (Invitrogen) to generate the  
500 final binary vector with *NIP2;1<sub>pro</sub>::NIP2;1-GFP*. The constructs were sequenced and verified by  
501 using Snap Gene 4.2.11 software. *Agrobacterium tumefaciens* GV3101 (Koncz and Schell,  
502 1986) was transformed with the final construct by electroporation with a Bio-Rad Gene Pulser  
503 Xcell Electroporation system. Colonies carrying the correct construct were verified by PCR, and  
504 were used to transform Arabidopsis *nip2;1* plants by using floral dip method (Clough and Bent,  
505 1998). Transgenic lines were selected on MS media supplemented with 25 µg/ml kanamycin,  
506 and were confirmed by PCR-based genotyping with transgene specific primers (Supplemental  
507 Table 1). Twelve transgenic lines were generated and the three with the highest *NIP2;1*  
508 transgene abundance were selected for further analysis. T<sub>2</sub> generation complementation lines  
509 were used for the studies.

510 **RNA Purification and Quantitative PCR** Total RNA was isolated from plant tissues by grinding  
511 on liquid nitrogen and extracted by PureLink Plant RNA Reagent (Invitrogen). RNA isolation  
512 and DNase treatment was carried out by Direct-zol RNA MiniPrep Plus Kit using the  
513 manufacturer's protocol (Zymo Research). Q-PCR was performed on a Bio-Rad IQ5 real-time  
514 PCR detection system by using iTaq Universal SYBR Green One-Step RT-qPCR kit (Bio-Rad  
515 Laboratories) according to the manufacturer's instructions. All gene specific primers used in this  
516 study are summarized in Supplementary Table 1. Quantitative expression analysis was

517 calculated by the comparative threshold cycle (Ct) method (Pfaffl, 2001). Either *UBQ10* or  
518 *ACTIN2* transcripts were used as the reference C<sub>t</sub> for calculating  $\Delta C_t$  for target gene expression,  
519 and standardization to a calibrator transcript ( $\Delta\Delta C_t$ ) was done as described in (Choi and  
520 Roberts, 2007). The specific calibrators described in the figure legends.

521 **Histochemical and microscopy techniques** GUS staining and clearing of *Arabidopsis*  
522 *thaliana* lines with the *NIP2;1<sub>pro</sub>:GUS* reporter transgene was done by the protocol of (Choi and  
523 Roberts 2007), and stained tissues were imaged with a LEICA MZ16FA microscope (Leica  
524 Microsystems.). For analysis of *NIP2;1* promoter activity in root cross-sections, GUS-stained  
525 roots were dehydrated in ethanol and embedded in Technovit 7100 resin by the manufacturer's  
526 (Kulzer GmbH) protocol. Cross sections (2.5  $\mu$ m thickness) were generated from the mature  
527 differentiated region of the primary root with a Reichert OMV3 microtome equipped with a glass  
528 knife, and were mounted in 50% (w/v) glycerol. Cross-sections were imaged with a Nikon  
529 ECLIPSE E600 microscope equipped with Micropublisher 3.3 and QCapture 2.60 software  
530 (QImaging corporation).

531 Epifluorescence imaging of *NIP2;1*-GFP plants were captured with an Axiovert 200M  
532 microscope (Zeiss) equipped with filters for GFP fluorescence (Zeiss; filter set 38 HE) and a  
533 digital camera (Hamamatsu Orca-ER) controlled by the Openlab software (Improvision).  
534 Subcellular localization analysis under hypoxia and reoxygenation was done by confocal  
535 microscopy. Hypoxia treatment was done with the argon protocol described above, and  
536 seedlings were removed from the plate and were incubated in 4  $\mu$ M FM4-64 under hypoxic  
537 conditions (Invitrogen) in darkness for 10 min. For reoxygenation, seedlings were returned to  
538 aerobic conditions under light for 1 hr before staining and visualization. Imaging was performed  
539 with a Leica SP8 white laser confocal microscope system at the Advanced Microscopy and  
540 Imaging Center at The University of Tennessee, Knoxville. The 488-nm excitation filter was  
541 used, and the emission filter for detection was set to 495 to 550 for GFP and 580 to 650 nm for  
542 FM4-64. Confocal micrographs were captured with the Leica LASX software and uncompressed

543 images were exported and analyzed in ImageJ version 1.53a (Schneider et al., 2012) to adjust  
544 the brightness and contrast of images, and to generate merged images.

545 **Immunochemical Techniques** Anti-NIP2;1 antisera were produced against a synthetic peptide  
546 (GenScript) corresponding to the C-terminal sequence of NIP2;1  
547 (CHKMLPSIQNAEPEFSKTGSSHKRV) following the immunization protocol of (Guenther et al.,  
548 2003) with the exception that Titermax-Gold was substituted for Freund's adjuvants. Antibodies  
549 were affinity purified on peptide resins as described in (Guenther et al., 2003).

550 For analysis of NIP2;1 protein in wild type and *nip2;1* mutant after hypoxia treatment,  
551 Arabidopsis root tissues from seedlings treated with 6 hr hypoxia or normoxic controls were  
552 extracted, a membrane microsomal fraction was prepared as described by (Ishikawa et al.,  
553 2005). Protein concentrations were determined by using the BCA assay (Pierce Biochemical).  
554 The SDS-gel electrophoresis and Western blot analysis were performed using 10 µg protein  
555 from membrane microsomal fractions as previously described (Guenther et al., 2003). For the  
556 analysis of NIP2;1-GFP expression in complementation lines, hypoxia and reoxygenation  
557 treatments were conducted as described above, and samples were directly extracted into SDS-  
558 PAGE sample buffer (Laemmli, 1970) for Western blot analysis. Rabbit anti-GFP polyclonal  
559 antibodies (Abcam) were used for the detection of NIP2;1-GFP.

560 **Media Acidification and L-Lactate Measurements** Media acidification assays with the pH-  
561 sensitive indicator bromocresol purple was done by the method of (Silva et al., 2018). Seven  
562 day wild type and *nip2;1* seedlings were transferred from MS media to 1.5% agarose plates  
563 containing 60 mg L<sup>-1</sup> Bromocresol Purple (Acros Organics) and 1mM CaSO<sub>4</sub> in sterile distilled  
564 water with the pH adjusted to 5.7 using KOH . The bromocresol purple plates with the seedlings  
565 were subjected to anaerobic condition as described above for 8 hrs before the images were  
566 captured with a DSLR camera (Canon Rebel XS).

567 To quantify the L-lactate efflux from roots to the external media, seven-day old wild type  
568 and *nip2;1* 7-d-old seedlings were transferred to Eppendorf tubes, with roots submerged in 1mL  
569 of HPLC water, and were subjected to argon gas treatment as described above. At the selected  
570 time points the plant material was removed and the L-lactate levels were quantified  
571 enzymatically (LDH) as described by (Marbach and Weil, 1967). To determine L-lactate  
572 concentration within Arabidopsis roots, hypoxia treatment of seedlings was carried out, roots  
573 were dissected, and tissues were snap frozen in liquid nitrogen. The frozen tissue was ground  
574 in a mortar with a pestle and was extracted in two volumes of 1N perchloric acid and was  
575 neutralized with potassium carbonate on ice prior to assay by the LDH method of (Bergmeyer  
576 and Bernt, 1974). NADH production was assayed by the change in absorbance at 340 nm, with  
577 background corrected from duplicate samples treated identically except for no added LDH  
578 enzyme.

579

580 **Gene Accession Information** Accession number of the genes used in this study are  
581 AT2g34390 (*NIP2;1*), AT4g33070 (*PDC1*), AT4g18360 (*GOX3*), AT1g17290 (*AlaAT1*),  
582 AT1g77120 (*ADH1*), AT3g18780 (*ACTIN 2*), AT4g05320 (*UBIQUITIN 10*), AT4g17260 (*LDH1*).

583

#### 584 **Supplemental data**

585 **Supplemental Figure 1** Cellular localization of *AtNIP2;1* promoter activity in the roots under  
586 normoxic growth conditions.

587 **Supplemental Figure 2** Complementation of *nip2;1* T-DNA mutant with a *NIP2;1pro::NIP2;1-*  
588 *GFP* construct.



589 **Supplemental Figure 3** Subcellular localization of NIP2;1-GFP in the roots of hypoxia

590 challenged 7-d-old *NIP2;1-GFP* complementation lines.

591 **Supplemental Figure 4** Comparison of hypoxia-induced expression of *NIP2;1* and lactate

592 metabolizing enzyme transcripts *LDH* and *GOX3*

593 **Supplemental Table 1** Oligonucleotide primers

594

595

596 Acknowledgements:

597 We appreciate the assistance and valuable contributions of the following undergraduate

598 students of the BCMB Department at the University of Tennessee, Knoxville: Samantha McIntire

599 for helping in phenotyping experiment, and Shivam Ishanpara for helping us in growing and

600 genotyping transgenic plants and preparing media for the experiments; and especially Clayton

601 Nunn who participated in initial localization experiments. We are thankful to Tessa Burch-Smith

602 and John Dunlap for assisting us in microscopy in initial studies, and Andreas Nebenfuehr for

603 allowing us to use his laboratory's dissecting and epifluorescence microscopes.

604

605 **Figure Legends**

606 **Figure 1** *NIP2;1* expression in *Arabidopsis* seedlings in response to oxygen deficit. A.

607 Quantitative real-time RT-PCR (Q-PCR) analysis of *NIP2;1* transcripts in root (filled squares)

608 and shoot (open squares) tissues during a hypoxia time course of two week old *Arabidopsis*

609 seedlings. The  $\Delta\text{Ct}$  value of *AtNIP2;1* obtained from 0 hr of shoot sample was used as the

610 calibrator for  $\Delta\Delta\text{Ct}$  calculations. The graph in the insert shows a rescaled plot of *NIP2;1*

611 expression in shoot tissue. Error bars indicate the SD of three biological replicates. B. GUS

612 staining analysis of two-week old *NIP2;1pro::GUS* *Arabidopsis* seedlings subjected to the

613 oxygen deprivation conditions as in panel A. Top panel are representative whole seedlings

614 while the bottom panel shows root cross-sections. Scale bars are 1.0 mm for the top panel and  
615 20  $\mu\text{m}$  in the bottom panel.

616

617 **Figure 2 Characterization of *nip2;1* T-DNA insertional mutant seedlings. A.** schematic  
618 diagram showing the T-DNA insertion in *nip2;1* mutant line. The boxes in the upstream portion  
619 of the gene indicate Anaerobic Response Elements. **B.** Q-PCR results for *NIP2;1* expression in  
620 the roots of 7d-old wild type and *nip2;1* during hypoxia treatment. The  $\Delta\text{Ct}$  value of *NIP2;1*  
621 expression in normoxic wild type roots was used as a calibrator for relative expression. Error  
622 bars show the SD of 3 biological replicates. **C.** Root extracts (10  $\mu\text{g}$  protein/lane) were analyzed  
623 by Western blot with site-directed NIP2;1 antibodies. **0 hr**, normoxic control; **6 hr**, 6 hr hypoxia-  
624 treated plants.

625 **Figure 3 Effects of oxygen deprivation on the survival of *nip2;1-1* T-DNA insertional**  
626 **mutant seedlings. A.** Seven-day-old, vertically grown seedlings corresponding to the wild-type  
627 (WT) and *nip2;1* T-DNA insertional mutant (*nip2;1*) were subjected to 8 hrs of argon gas  
628 treatment and were allowed to recover under normal oxygen conditions for 72 hours. Scale bar  
629 = 1 cm **B.** PSII maximal quantum yield,  $\text{QY}_{\text{max}}$  ( $F_v/F_m$ ) was calculated from chlorophyll  
630 fluorescence analysis of 16hr light, 8hr dark grown 7-days-old WT and *nip2;1* mutant seedlings  
631 treated with 8 hr argon in dark (hypoxia) or air control (normoxia). Error bars represent std. error  
632 of mean of five biological replicates. Statistical significance was assessed by student t-test  
633 analysis to the wild type survival value. (\* represents  $p < 0.05$ ) **C.** Histogram showing the survival  
634 of seven day old WT, *nip2;1*, and *NIP2;1-GFP* complementation seedlings to 8 hr argon  
635 treatment represented as a box and whisker plot of % seedling survival. Each data point  
636 represents one biological replicate with the median value indicated in each box. Statistical  
637 significance was assessed by student t-test analysis to the wild type survival value. (\*\*\*\*  
638 represents  $p < 0.0001$ ; ns, not significant).

639 **Figure 4 NIP2;1-GFP expression in the roots of *NIP2;1:GFP* plants during hypoxia and**  
640 **reoxy- genation.** Ten day old *NIP2;1-GFP* plants were subjected to an argon-induced hypoxia  
641 time course, with oxygen resupplied at hour 6. **A.** Representative epifluorescent images of the  
642 primary root of *NIP2;1:GFP* plants at the indicated times of hypoxia treatment or reoxygenation  
643 recovery. Scale bars = 50  $\mu$ m. **B.** Anti-GFP Western blot showing NIP2;1-GFP protein  
644 accumulation (upper panel). The NIP2;1-GFP fusion protein and free GFP are indicated. Bottom  
645 panel, Coomassie blue stained loading control gel. **C.** Comparison of root *NIP2;1-GFP* transcript  
646 levels (normalized to 0 hr) by Q-PCR (*left*) and NIP2;1-GFP protein based on densitometry of  
647 the Western blot in panel B.

648 **Figure 5 Subcellular localization of NIP2;1-GFP in the roots of hypoxia challenged 7-d-old**  
649 ***NIP2;1-GFP* complementation lines.** Seven-day-old vertically grown *NIP2;1-GFP* seedlings  
650 were subjected to anaerobic stress by root submergence under argon gas treatment followed by  
651 return to aerobic conditions at 6 hr. The appearance of NIP2;1 GFP was monitored at the times  
652 indicated by confocal fluorescence microscopy of the root elongation zone. FM4-64 staining was  
653 used to visualize the plasma membrane. DIC, differential interference contrast images. Bars =  
654 50  $\mu$ m.

655 **Figure 6 Media acidification and lactic acid efflux in hypoxia-challenged *nip2;1* and wild**  
656 **type plants.** **A.** Ten day-old *nip2;1* and wild-type (WT) seedlings were transferred to pH  
657 indicator plates containing bromocresol purple, and were subjected to 8 h treatment of hypoxia  
658 induced by argon gas (**Argon**). **Air** indicates a normoxic control. A color change from purple to  
659 yellow indicates a decrease in the pH of the environment. Scale bar = 1 cm. **B.** 10-d-old *nip2;1*  
660 and wild-type seedlings were submerged in water and subjected to argon gas treatment for 8 hr  
661 and the lactate concentration in the media was measured. Data are represented as a scatter  
662 plot of eight biological replicates with the horizontal line representing the mean and error bars  
663 showing the SE. **C.** Accumulation of lactate in seedlings based on enzymatic analysis during

664 hypoxia induced by bubbling nitrogen gas. Values are the average of three biological replicates  
665 at each timepoint, with the error bars showing the SEM. Asterisks indicate statistically significant  
666 differences based on a paired Student's t-test analysis (panel B) or One way ANOVA analysis  
667 (panel C).

668 **Figure 7 Effect of *nip2;1* mutation on transcripts of pyruvate metabolism enzymes. A.**

669 Scheme showing the principal pathways of pyruvate and lactate metabolism during  
670 fermentation. **B.** Q-PCR analysis of the indicated transcripts in the roots of seven day old wild-  
671 type seedlings grown under normoxic conditions (black bars) or in response to 4 hr of argon-  
672 induced hypoxia (stripped bars). The data are normalized to the transcript levels of LDH under  
673 normoxic conditions (normalized expression =  $2^{-\Delta\Delta Ct-LDH}$ ). Data are the average of nine replicates  
674 with the error bars showing the SD. **C.** Comparison of the hypoxia-induced changes of selected  
675 transcripts from the roots of wild type and *nip2;1* seedlings. The data were normalized to the  
676 expression levels of the indicated transcript under normoxic conditions. Data are the average of  
677 six determinations from three biological replicates with the error bars showing the SD. Asterisks  
678 indicate statistically significant differences based on an unpaired Student's t-test analysis.

679

680

681 **References**

682 Armstrong W, Beckett PM, Colmer TD, Setter TL, Greenway H (2019) Tolerance of roots to low  
683 oxygen: 'Anoxic' cores, the phytooglobin-nitric oxide cycle, and energy or oxygen sensing.  
684 Journal of Plant Physiology 239: 92-108  
685 Armstrong W, Strange ME, Cringle S, Beckett PM (1994) Microelectrode and Modeling Study of  
686 Oxygen Distribution in Roots. Annals of Botany 74: 287-299  
687 Bergmeyer HU, Bernt E (1974) Colorimetric Assay with I-Lactate, NAD Phenazine  
688 Methosulphate and INT. In HU Bergmeyer, ed, Methods of Enzymatic Analysis (Second  
689 Edition). Academic Press, pp 579-582  
690 Bienert GP, Desguin B, Chaumont F, Hols P (2013) Channel-mediated lactic acid transport: a  
691 novel function for aquaglyceroporins in bacteria. Biochem J 454: 559-570

- 692 Boursiac Y, Prak S, Boudet J, Postaire O, Luu DT, Tournaire-Roux C, Santoni V, Maurel C  
693 (2008) The response of Arabidopsis root water transport to a challenging environment  
694 implicates reactive oxygen species- and phosphorylation-dependent internalization of  
695 aquaporins. *Plant Signal Behav* 3: 1096-1098
- 696 Branco-Price C, Kaiser KA, Jang CJ, Larive CK, Bailey-Serres J (2008) Selective mRNA  
697 translation coordinates energetic and metabolic adjustments to cellular oxygen  
698 deprivation and reoxygenation in *Arabidopsis thaliana*. *Plant J* 56: 743-755
- 699 Branco-Price C, Kawaguchi R, Ferreira RB, Bailey-Serres J (2005) Genome-wide analysis of  
700 transcript abundance and translation in *Arabidopsis* seedlings subjected to oxygen  
701 deprivation. *Ann Bot* 96: 647-660
- 702 Chevalier AS, Chaumont F (2015) Trafficking of plant plasma membrane aquaporins: multiple  
703 regulation levels and complex sorting signals. *Plant Cell Physiol* 56: 819-829
- 704 Choi WG, Roberts DM (2007) *Arabidopsis* NIP2;1, a major intrinsic protein transporter of lactic  
705 acid induced by anoxic stress. *J Biol Chem* 282: 24209-24218
- 706 Clough SJ, Bent AF (1998) Floral dip: a simplified method for *Agrobacterium*-mediated  
707 transformation of *Arabidopsis thaliana*. *Plant J* 16: 735-743
- 708 Collard F, Baldin F, Gerin I, Bolsee J, Noel G, Graff J, Veiga-da-Cunha M, Stroobant V,  
709 Vertommen D, Houddane A, Rider MH, Linster CL, Van Schaftingen E, Bommer GT  
710 (2016) A conserved phosphatase destroys toxic glycolytic side products in mammals  
711 and yeast. *Nat Chem Biol* 12: 601-607
- 712 Counillon L, Bouret Y, Marchiq I, Pouyssegur J (2016) Na<sup>+</sup>/H<sup>+</sup> antiporter (NHE1) and lactate/H<sup>+</sup>  
713 symporters (MCTs) in pH homeostasis and cancer metabolism. *Biochimica Et*  
714 *Biophysica Acta-Molecular Cell Research* 1863: 2465-2480
- 715 Davies DD, Grego S, Kenworthy P (1974) The control of the production of lactate and ethanol  
716 by higher plants. *Planta* 118: 297-310
- 717 Dolferus R, Wolansky M, Carroll R, Miyashita Y, Ismond K, Good A (2008) Functional analysis  
718 of lactate dehydrogenase during hypoxic stress in *Arabidopsis*. *Functional Plant Biology*  
719 35: 131-140
- 720 Drew MC (1997) OXYGEN DEFICIENCY AND ROOT METABOLISM: Injury and Acclimation  
721 Under Hypoxia and Anoxia. *Annu Rev Plant Physiol Plant Mol Biol* 48: 223-250
- 722 Ellis MH, Dennis ES, Peacock WJ (1999) *Arabidopsis* roots and shoots have different  
723 mechanisms for hypoxic stress tolerance. *Plant Physiol* 119: 57-64
- 724 Engqvist MK, Schmitz J, Gertzmann A, Florian A, Jaspert N, Arif M, Balazadeh S, Mueller-  
725 Roeber B, Fernie AR, Maurino VG (2015) GLYCOLATE OXIDASE3, a Glycolate

- 726 Oxidase Homolog of Yeast L-Lactate Cytochrome c Oxidoreductase, Supports L-Lactate  
727 Oxidation in Roots of Arabidopsis. *Plant Physiol* 169: 1042-1061
- 728 Faghiri Z, Camargo SM, Huggel K, Forster IC, Ndegwa D, Verrey F, Skelly PJ (2010) The  
729 tegument of the human parasitic worm *Schistosoma mansoni* as an excretory organ: the  
730 surface aquaporin SmAQP is a lactate transporter. *PLoS One* 5: e10451
- 731 Felle HH (2005) pH regulation in anoxic plants. *Annals of Botany* 96: 519-532
- 732 Gibbs J, Greenway H (2003) Mechanisms of anoxia tolerance in plants. I. Growth, survival and  
733 anaerobic catabolism (vol 30, pg 1, 1993). *Functional Plant Biology* 30: 353-U356
- 734 Giuntoli B, Lee SC, Licausi F, Kosmacz M, Oosumi T, van Dongen JT, Bailey-Serres J, Perata  
735 P (2014) A trihelix DNA binding protein counterbalances hypoxia-responsive  
736 transcriptional activation in Arabidopsis. *PLoS Biol* 12: e1001950
- 737 Greenway H, Gibbs J (2003) Mechanisms of anoxia tolerance in plants. II. Energy requirements  
738 for maintenance and energy distribution to essential processes. *Functional Plant Biology*  
739 30: 999-1036
- 740 Guenther JF, Chanmanivone N, Galetovic MP, Wallace IS, Cobb JA, Roberts DM (2003)  
741 Phosphorylation of soybean nodulin 26 on serine 262 enhances water permeability and  
742 is regulated developmentally and by osmotic signals. *The Plant cell* 15: 981-991
- 743 Ishikawa F, Suga S, Uemura T, Sato MH, Maeshima M (2005) Novel type aquaporin SIPs are  
744 mainly localized to the ER membrane and show cell-specific expression in Arabidopsis  
745 thaliana. *FEBS Lett* 579: 5814-5820
- 746 Ismond KP, Dolferus R, De Pauw M, Dennis ES, Good AG (2003) Enhanced low oxygen  
747 survival in Arabidopsis through increased metabolic flux in the fermentative pathway.  
748 *Plant Physiology* 132: 1292-1302
- 749 Johanson U, Karlsson M, Johansson I, Gustavsson S, Sjovall S, Frayssse L, Weig AR, Kjellbom  
750 P (2001) The complete set of genes encoding major intrinsic proteins in Arabidopsis  
751 provides a framework for a new nomenclature for major intrinsic proteins in plants. *Plant*  
752 *Physiol* 126: 1358-1369
- 753 Kamiya T, Fujiwara T (2009) Arabidopsis NIP1;1 transports antimonite and determines  
754 antimonite sensitivity. *Plant Cell Physiol* 50: 1977-1981
- 755 Kamiya T, Tanaka M, Mitani N, Ma JF, Maeshima M, Fujiwara T (2009) NIP1;1, an aquaporin  
756 homolog, determines the arsenite sensitivity of Arabidopsis thaliana. *J Biol Chem* 284:  
757 2114-2120

- 758 Koncz C, Schell J (1986) The promoter of TL-DNA gene 5 controls the tissue-specific  
759 expression of chimaeric genes carried by a novel type of Agrobacterium binary vector.  
760 Molecular and General Genetics MGG 204: 383-396
- 761 Kursteiner O, Dupuis I, Kuhlemeier C (2003) The pyruvate decarboxylase1 gene of Arabidopsis  
762 is required during anoxia but not other environmental stresses. Plant Physiol 132: 968-  
763 978
- 764 Laemmli UK (1970) Cleavage of structural proteins during the assembly of the head of  
765 bacteriophage T4. Nature 227: 680-685
- 766 Latham T, Mackay L, Sproul D, Karim M, Culley J, Harrison DJ, Hayward L, Langridge-Smith P,  
767 Gilbert N, Ramsahoye BH (2012) Lactate, a product of glycolytic metabolism, inhibits  
768 histone deacetylase activity and promotes changes in gene expression. Nucleic Acids  
769 Research 40: 4794-4803
- 770 Lee SC, Mustrup A, Sasidharan R, Vashisht D, Pedersen O, Oosumi T, Voeselek LA, Bailey-  
771 Serres J (2011) Molecular characterization of the submergence response of the  
772 Arabidopsis thaliana ecotype Columbia. The New phytologist 190: 457-471
- 773 Li X, Wang X, Yang Y, Li R, He Q, Fang X, Luu DT, Maurel C, Lin J (2011) Single-molecule  
774 analysis of PIP2;1 dynamics and partitioning reveals multiple modes of Arabidopsis  
775 plasma membrane aquaporin regulation. Plant Cell 23: 3780-3797
- 776 Licausi F, van Dongen JT, Giuntoli B, Novi G, Santaniello A, Geigenberger P, Perata P (2010)  
777 HRE1 and HRE2, two hypoxia-inducible ethylene response factors, affect anaerobic  
778 responses in Arabidopsis thaliana. Plant J 62: 302-315
- 779 Liu F, Vantoai T, Moy LP, Bock G, Linford LD, Quackenbush J (2005) Global transcription  
780 profiling reveals comprehensive insights into hypoxic response in Arabidopsis. Plant  
781 Physiol 137: 1115-1129
- 782 Lokdarshi A, Conner WC, McClintock C, Li T, Roberts DM (2016) Arabidopsis CML38, a  
783 Calcium Sensor That Localizes to Ribonucleoprotein Complexes under Hypoxia Stress.  
784 Plant Physiol 170: 1046-1059
- 785 Marbach EP, Weil MH (1967) Rapid enzymatic measurement of blood lactate and pyruvate. Use  
786 and significance of metaphosphoric acid as a common precipitant. Clin Chem 13: 314-  
787 325
- 788 Mateluna P, Salvatierra A, Solis S, Nunez G, Pimentel P (2018) Involvement of aquaporin  
789 NIP1;1 in the contrasting tolerance response to root hypoxia in Prunus rootstocks. J  
790 Plant Physiol 228: 19-28

- 791 Maurino VG, Engqvist MK (2015) 2-Hydroxy Acids in Plant Metabolism. Arabidopsis Book 13:  
792 e0182
- 793 Mizutani M, Watanabe S, Nakagawa T, Maeshima M (2006) Aquaporin NIP2;1 is mainly  
794 localized to the ER membrane and shows root-specific accumulation in Arabidopsis  
795 thaliana. Plant and Cell Physiology 47: 1420-1426
- 796 Murchie EH, Lawson T (2013) Chlorophyll fluorescence analysis: a guide to good practice and  
797 understanding some new applications. J Exp Bot 64: 3983-3998
- 798 Mustroph A, Barding GA, Jr., Kaiser KA, Larive CK, Bailey-Serres J (2014) Characterization of  
799 distinct root and shoot responses to low-oxygen stress in Arabidopsis with a focus on  
800 primary C- and N-metabolism. Plant Cell Environ 37: 2366-2380
- 801 Mustroph A, Lee SC, Oosumi T, Zanetti ME, Yang HJ, Ma K, Yaghoubi-Masihi A, Fukao T,  
802 Bailey-Serres J (2010) Cross-Kingdom Comparison of Transcriptomic Adjustments to  
803 Low-Oxygen Stress Highlights Conserved and Plant-Specific Responses. Plant  
804 Physiology 152: 1484-1500
- 805 Mustroph A, Zanetti ME, Jang CJ, Holtan HE, Repetti PP, Galbraith DW, Girke T, Bailey-Serres  
806 J (2009) Profiling transcriptomes of discrete cell populations resolves altered cellular  
807 priorities during hypoxia in Arabidopsis. Proc Natl Acad Sci U S A 106: 18843-18848
- 808 Niyikiza D, Piya S, Routray P, Miao L, Kim WS, Burch-Smith T, Gill T, Sams C, Arelli PR,  
809 Pantalone V, Krishnan HB, Hewezi T (2020) Interactions of gene expression, alternative  
810 splicing, and DNA methylation in determining nodule identity. Plant J
- 811 Noda Y, Sasaki S (2006) Regulation of aquaporin-2 trafficking and its binding protein complex.  
812 Biochim Biophys Acta 1758: 1117-1125
- 813 Pfaffl MW (2001) A new mathematical model for relative quantification in real-time RT-PCR.  
814 Nucleic Acids Res 29: e45
- 815 Pommerrenig B, Diehn TA, Bernhardt N, Bienert MD, Mitani-Ueno N, Fuge J, Bieber A, Spitzer  
816 C, Brautigam A, Ma JF, Chaumont F, Bienert GP (2020) Functional evolution of nodulin  
817 26-like intrinsic proteins: from bacterial arsenic detoxification to plant nutrient transport.  
818 New Phytol 225: 1383-1396
- 819 Prak S, Hem S, Boudet J, Viennois G, Sommerer N, Rossignol M, Maurel C, Santoni V (2008)  
820 Multiple phosphorylations in the C-terminal tail of plant plasma membrane aquaporins:  
821 role in subcellular trafficking of AtPIP2;1 in response to salt stress. Mol Cell Proteomics  
822 7: 1019-1030



- 823 Ricoult C, Cliquet J-B, Limami AM (2005) Stimulation of alanine amino transferase (AlaAT) gene  
824 expression and alanine accumulation in embryo axis of the model legume *Medicago*  
825 *truncatula* contribute to anoxia stress tolerance. *Physiologia Plantarum* 123: 30-39
- 826 Rivoal J, Hanson AD (1993) Evidence for a Large and Sustained Glycolytic Flux to Lactate in  
827 Anoxic Roots of Some Members of the Halophytic Genus *Limonium*. *Plant Physiol* 101:  
828 553-560
- 829 Roberts DM, Routray P (2017) The Nodulin26 Intrinsic Protein Subfamily. *In* F Chaumont, SD  
830 Tyerman, eds, *Plant Aquaporins From Transport to Signaling*. Springer International  
831 Publishing, pp 267-296
- 832 Roberts JK, Callis J, Jardetzky O, Walbot V, Freeling M (1984) Cytoplasmic acidosis as a  
833 determinant of flooding intolerance in plants. *Proc Natl Acad Sci U S A* 81: 6029-6033
- 834 Santoni V (2017) Plant Aquaporin Postranslational Regulation. *In* F Chaumont, SD Tyerman,  
835 eds, *Plant Aquaporins From Transport to Signaling*. Springer International Publishing, pp  
836 83-105
- 837 Sato T, Harada T, Ishizawa K (2002) Stimulation of glycolysis in anaerobic elongation of  
838 pondweed (*Potamogeton distinctus*) turions. *J Exp Bot* 53: 1847-1856
- 839 Schneider CA, Rasband WS, Eliceiri KW (2012) NIH Image to ImageJ: 25 years of image  
840 analysis. *Nat Methods* 9: 671-675
- 841 Silva AL, Dressano K, Ceciliato PHO, Guerrero-Abad JC, Moura DS (2018) Evaluation of Root  
842 pH Change Through Gel Containing pH-sensitive Indicator Bromocresol Purple. *Bio-*  
843 *Protocol* 8(7):e2796
- 844 Sorenson R, Bailey-Serres J (2014) Selective mRNA sequestration by OLIGOURIDYLATE-  
845 BINDING PROTEIN 1 contributes to translational control during hypoxia in *Arabidopsis*.  
846 *Proc Natl Acad Sci U S A* 111: 2373-2378
- 847 Sun SR, Li H, Chen JH, Qian Q (2017) Lactic Acid: No Longer an Inert and End-Product of  
848 Glycolysis. *Physiology* 32: 453-463
- 849 Takano J, Miwa K, Fujiwara T (2008) Boron transport mechanisms: collaboration of channels  
850 and transporters. *Trends Plant Sci* 13: 451-457
- 851 Takano J, Yoshinari A, Luu D-T (2017) Plant Aquaporin Trafficking. *In* F Chaumont, SD  
852 Tyerman, eds, *Plant Aquaporins From Transport to Signaling*. Springer International  
853 Publishing, pp 47-81
- 854 Tsai KJ, Chou SJ, Shih MC (2014) Ethylene plays an essential role in the recovery of  
855 *Arabidopsis* during post-anaerobiosis reoxygenation. *Plant Cell Environ* 37: 2391-2405

- 856 Vialaret J, Di Pietro M, Hem S, Maurel C, Rossignol M, Santoni V (2014) Phosphorylation  
857 dynamics of membrane proteins from Arabidopsis roots submitted to salt stress.  
858 Proteomics 14: 1058-1070
- 859 Voeselek LA, Bailey-Serres J (2013) Flooding tolerance: O<sub>2</sub> sensing and survival strategies.  
860 Curr Opin Plant Biol 16: 647-653
- 861 Voeselek LA, Bailey-Serres J (2015) Flood adaptive traits and processes: an overview. New  
862 Phytol 206: 57-73
- 863 Wallace IS, Choi WG, Roberts DM (2006) The structure, function and regulation of the nodulin  
864 26-like intrinsic protein family of plant aquaglyceroporins. Biochim Biophys Acta 1758:  
865 1165-1175
- 866 Wang S, Yoshinari A, Shimada T, Hara-Nishimura I, Mitani-Ueno N, Feng Ma J, Naito S,  
867 Takano J (2017) Polar Localization of the NIP5;1 Boric Acid Channel Is Maintained by  
868 Endocytosis and Facilitates Boron Transport in Arabidopsis Roots. Plant Cell 29: 824-  
869 842
- 870 Wang X, Fan C, Zhang X, Zhu J, Fu YF (2013) BioVector, a flexible system for gene specific-  
871 expression in plants. BMC Plant Biol 13: 198
- 872 Weaver CD, Crombie B, Stacey G, Roberts DM (1991) Calcium-dependent phosphorylation of  
873 symbiosome membrane proteins from nitrogen-fixing soybean nodules : evidence for  
874 phosphorylation of nodulin-26. Plant Physiol 95: 222-227
- 875 Woody ST, Austin-Phillips S, Amasino RM, Krysan PJ (2007) The WiscDsLox T-DNA collection:  
876 an arabidopsis community resource generated by using an improved high-throughput T-  
877 DNA sequencing pipeline. J Plant Res 120: 157-165
- 878 Xia JH, Roberts J (1994) Improved Cytoplasmic pH Regulation, Increased Lactate Efflux, and  
879 Reduced Cytoplasmic Lactate Levels Are Biochemical Traits Expressed in Root Tips of  
880 Whole Maize Seedlings Acclimated to a Low-Oxygen Environment. Plant Physiol 105:  
881 651-657
- 882 Xia JH, Saglio PH (1992) Lactic Acid efflux as a mechanism of hypoxic acclimation of maize  
883 root tips to anoxia. Plant Physiol 100: 40-46
- 884 Xu W, Dai W, Yan H, Li S, Shen H, Chen Y, Xu H, Sun Y, He Z, Ma M (2015) Arabidopsis  
885 NIP3;1 Plays an Important Role in Arsenic Uptake and Root-to-Shoot Translocation  
886 under Arsenite Stress Conditions. Mol Plant 8: 722-733
- 887 Yeung E, Bailey-Serres J, Sasidharan R (2019) After The Deluge: Plant Revival Post-Flooding.  
888 Trends Plant Sci 24: 443-454

889 Zhang D, Tang Z, Huang H, Zhou G, Cui C, Weng Y, Liu W, Kim S, Lee S, Perez-Neut M, Ding J,  
890 Czyz D, Hu R, Ye Z, He M, Zheng YG, Shuman HA, Dai L, Ren B, Roeder RG, Becker L,  
891 Zhao Y (2019) Metabolic regulation of gene expression by histone lactylation. *Nature* 574:  
892 575-580  
893

**A**

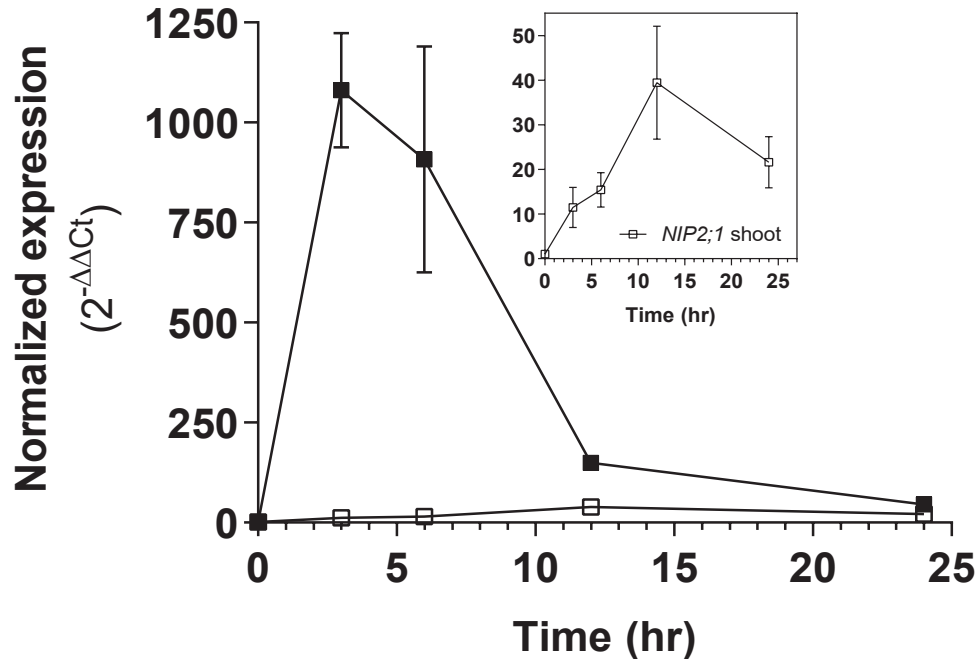

**B**

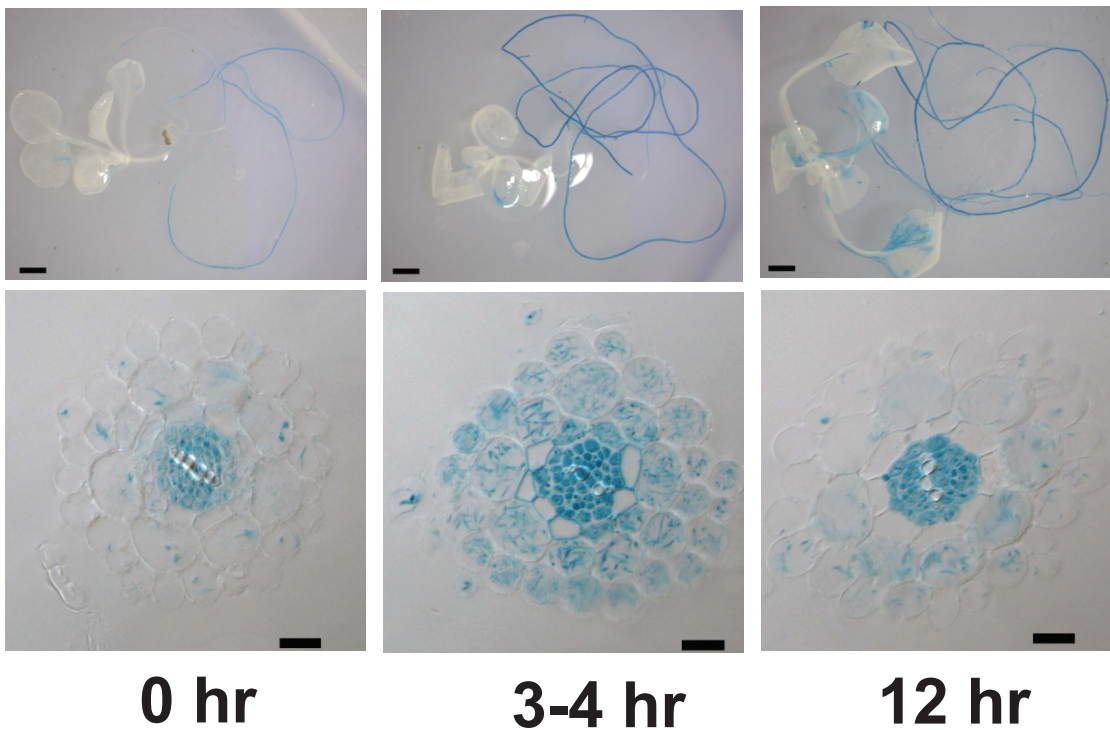

**Figure 1 *NIP2;1* expression in Arabidopsis seedlings in response to oxygen deficit. A.** Quantitative real-time RT-PCR (Q-PCR) analysis of *NIP2;1* transcripts in root (filled squares) and shoot (open squares) tissues during a hypoxia time course of two week old Arabidopsis seedlings. The  $\Delta Ct$  value of At*NIP2;1* obtained from 0 hr of shoot sample was used as the calibrator for  $\Delta\Delta Ct$  calculations. The graph in the insert shows a rescaled plot of *NIP2;1* expression in shoot tissue. Error bars indicate the SD of three biological replicates. **B.** GUS staining analysis of two-week old *NIP2;1pro::GUS* Arabidopsis seedlings subjected to the oxygen deprivation conditions as in panel A. Top panel are representative whole seedlings while the bottom panel shows root cross-sections. Scale bars are 1.0 mm for the top panel and 20  $\mu m$  in the bottom panel.

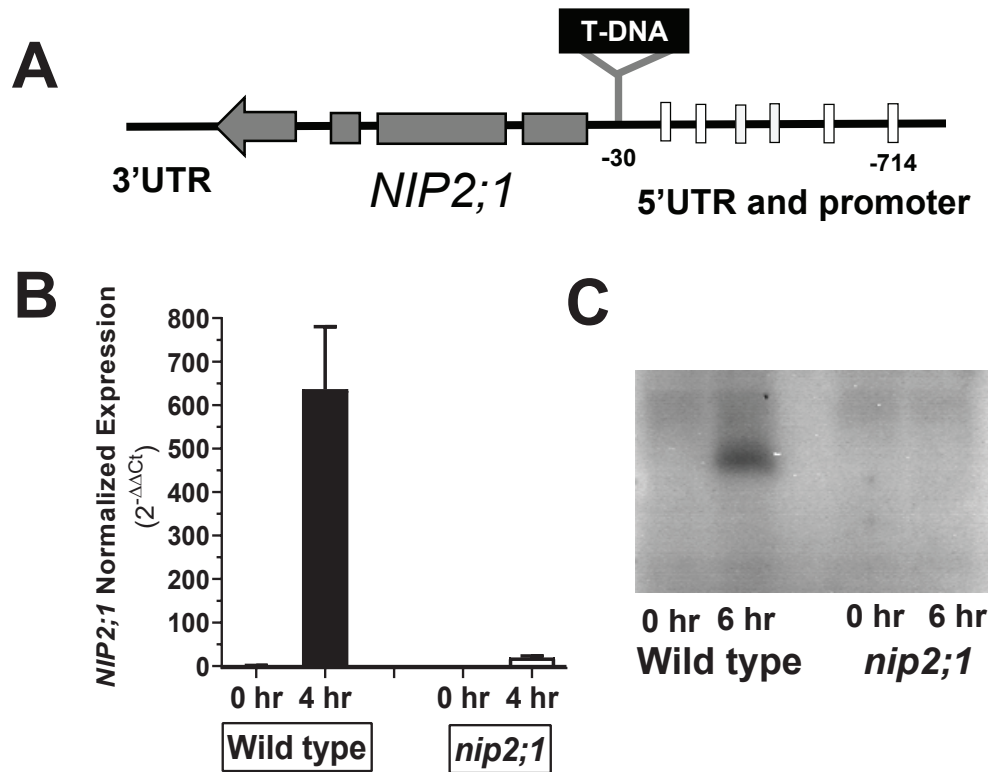

**Figure 2 Characterization of *nip2;1* T-DNA insertional mutant seedlings. A.** schematic diagram showing the T-DNA insertion in *nip2;1* mutant line. The boxes in the upstream portion of the gene indicate Anaerobic Response Elements. **B.** Q-PCR results for *NIP2;1* expression in the roots of 7d-old wild type and *nip2;1* during hypoxia treatment. The  $\Delta C_t$  value of *NIP2;1* expression in normoxic wild type roots was used as a calibrator for relative expression. Error bars show the SD of 3 biological replicates. **C.** Root extracts (10  $\mu$ g protein/lane) were analyzed by Western blot with site-directed *NIP2;1* antibodies. **0 hr**, normoxic control; **6 hr**, 6 hr hypoxia-treated plants.

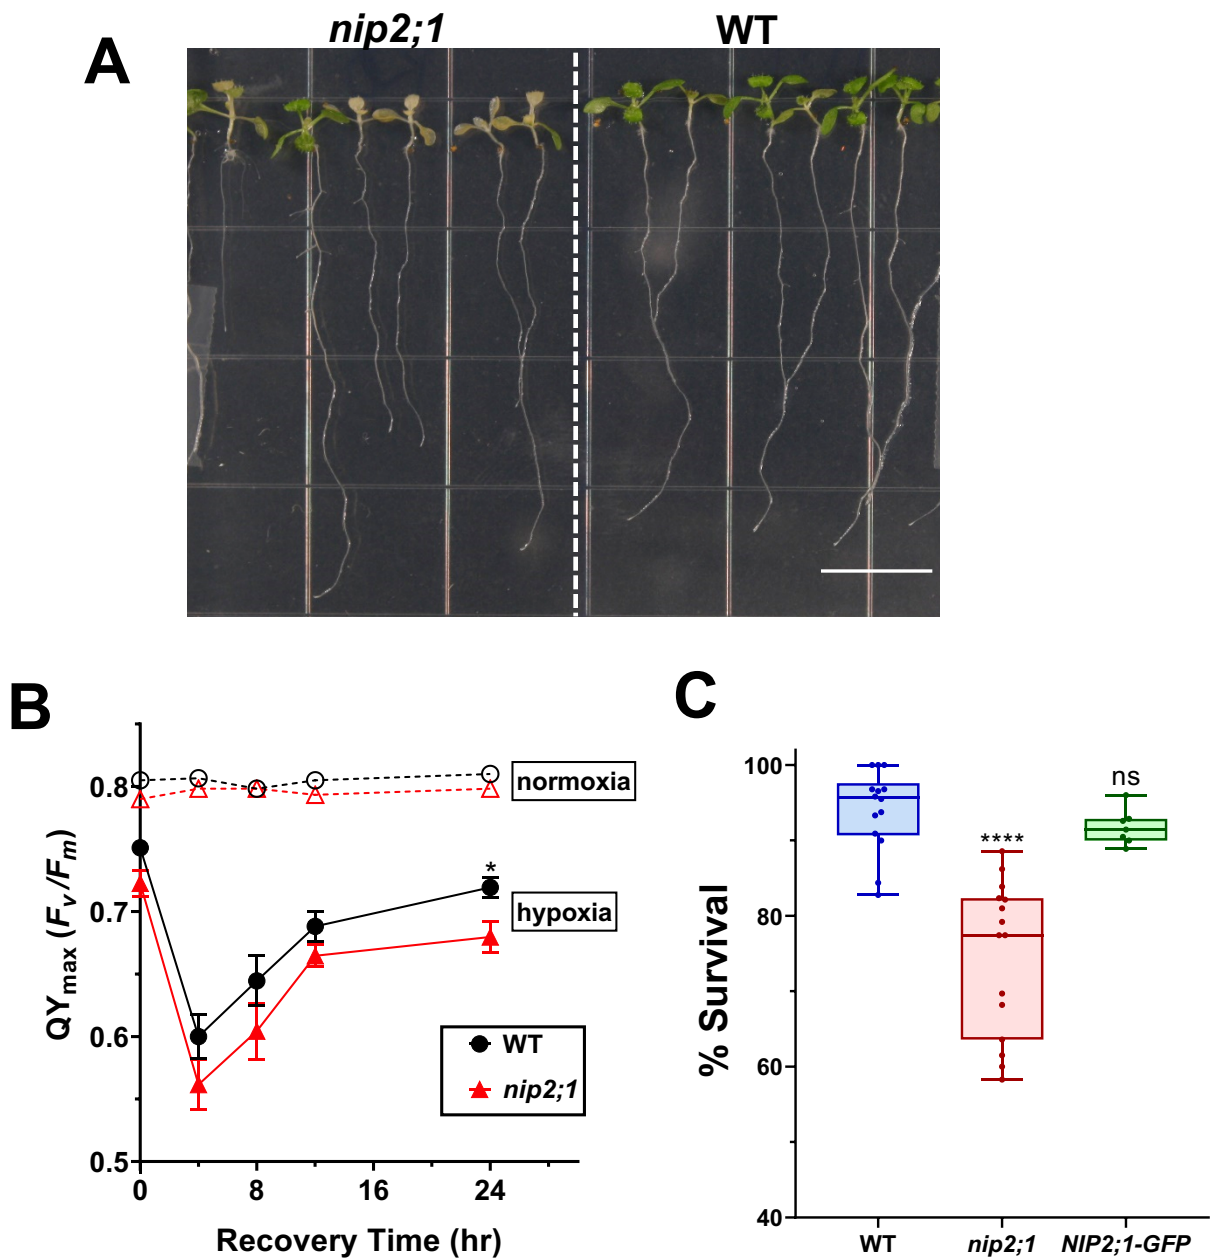

**Figure 3 Effects of oxygen deprivation on the survival of *nip2;1-1* T-DNA insertional mutant seedlings. A.** Seven-day-old, vertically grown seedlings corresponding to the wild-type (WT) and *nip2;1* T-DNA insertional mutant (*nip2;1*) were subjected to 8 hrs of argon gas treatment and were allowed to recover under normal oxygen conditions for 72 hours. Scale bar = 1 cm **B.** PSII maximal quantum yield, QY<sub>max</sub> ( $F_v/F_m$ ) was calculated from chlorophyll fluorescence analysis of 16hr light, 8hr dark grown 7-days-old WT and *nip2;1* mutant seedlings treated with 8 hr argon in dark (hypoxia) or air control (normoxia). Error bars represent std. error of mean of five biological replicates. Statistical significance was assessed by student t-test analysis to the wild type survival value. (\* represents  $p < 0.05$ ) **C.** Histogram showing the survival of seven day old WT, *nip2;1*, and NIP2;1-GFP complementation seedlings to 8 hr argon treatment represented as a box and whisker plot of % seedling survival. Each data point represents one biological replicate with the median value indicated in each box. Statistical significance was assessed by student t-test analysis to the wild type survival value. (\*\*\*\* represents  $p < 0.0001$ ; ns, not significant).

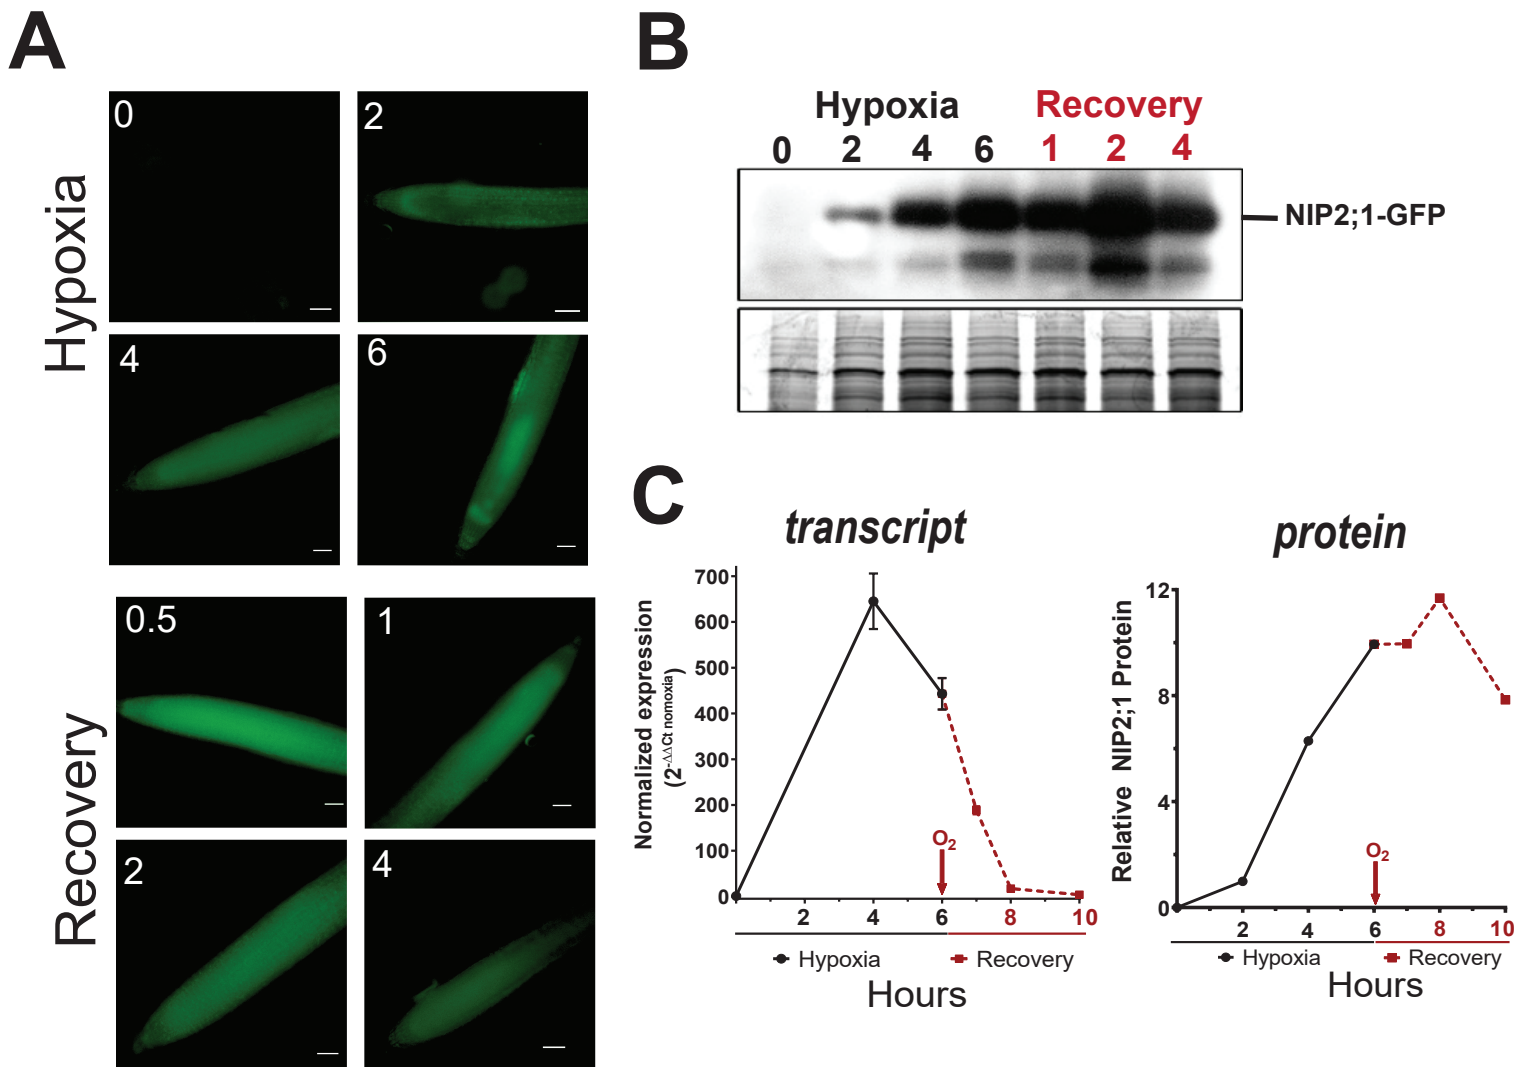

**Figure 4 NIP2;1-GFP expression in the roots of *NIP2;1:GFP* plants during hypoxia and reoxygenation.** Ten day old *NIP2;1:GFP* plants were subjected to an argon-induced hypoxia time course, with oxygen resupplied at hour 6. **A.** Representative epifluorescent images of the primary root of *NIP2;1:GFP* plants at the indicated times of hypoxia treatment or reoxygenation recovery. Scale bars = 50  $\mu$ m. **B.** Anti-GFP Western blot showing NIP2;1-GFP protein accumulation (upper panel). Bottom panel, Coomassie blue stained loading control gel. **C.** Comparison of root *NIP2;1-GFP* transcript levels (normalized to 0 hr) by Q-PCR (left) and NIP2;1-GFP protein based on densitometry of the Western blot in panel B.

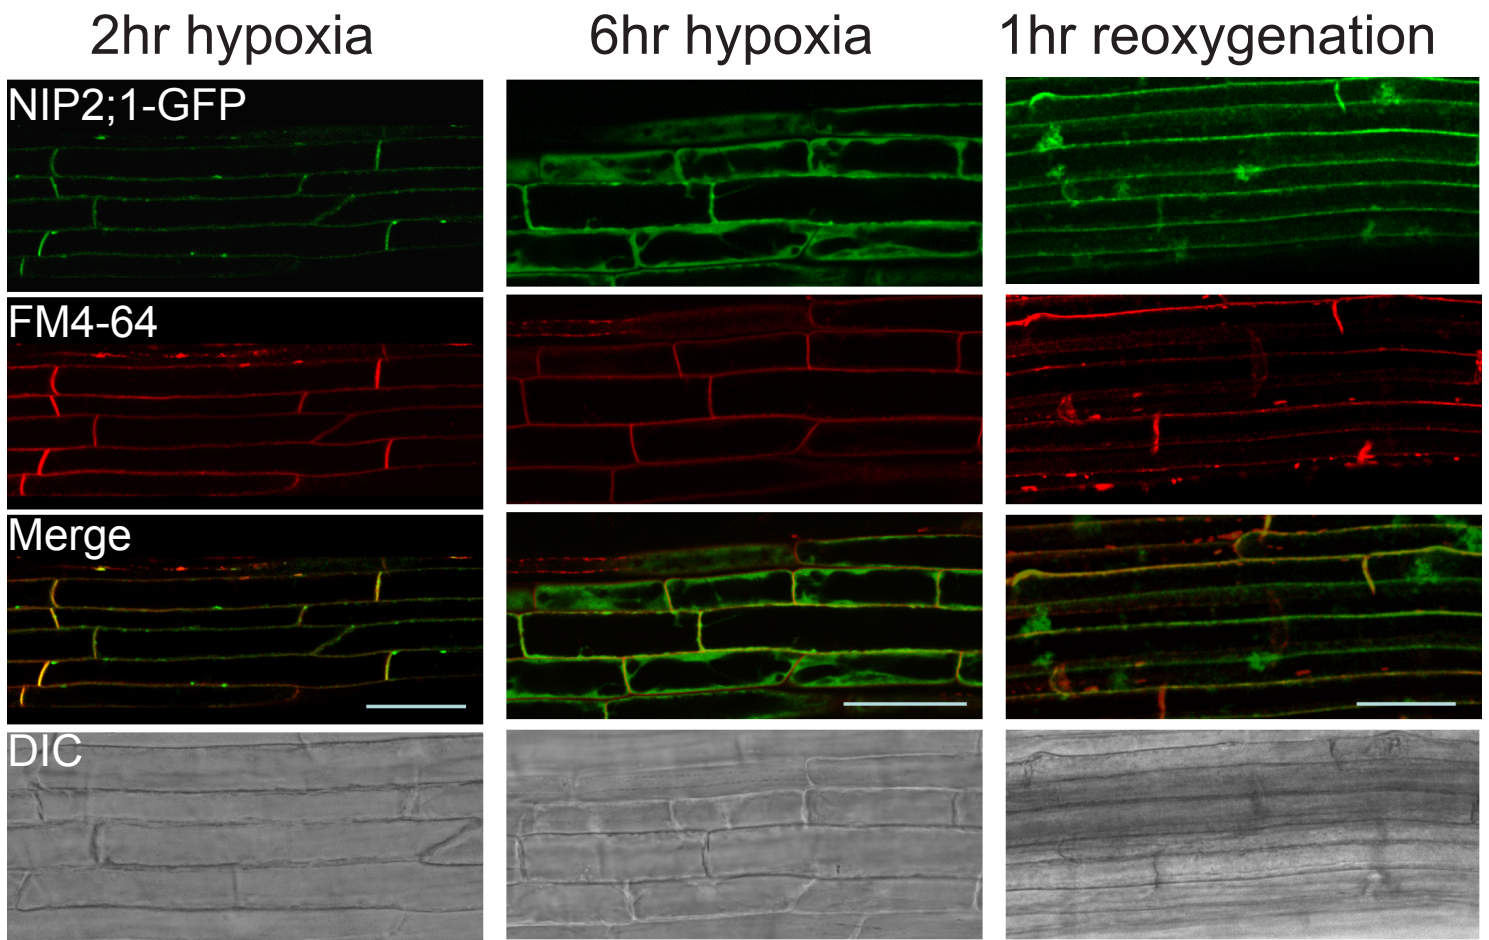

**Figure 5 Subcellular localization of NIP2;1-GFP in the roots of hypoxia challenged 7-d-old *NIP2;1-GFP* complementation lines.** Seven-day-old vertically grown *NIP2;1-GFP* seedlings were subjected to anaerobic stress by root submergence under argon gas treatment followed by return to aerobic conditions at 6 hr. The appearance of NIP2;1 GFP was monitored at the times indicated by confocal fluorescence microscopy of the root elongation zone. FM4-64 staining was used to visualize the plasma membrane. DIC, differential interference contrast images. Bars = 50  $\mu$ m.



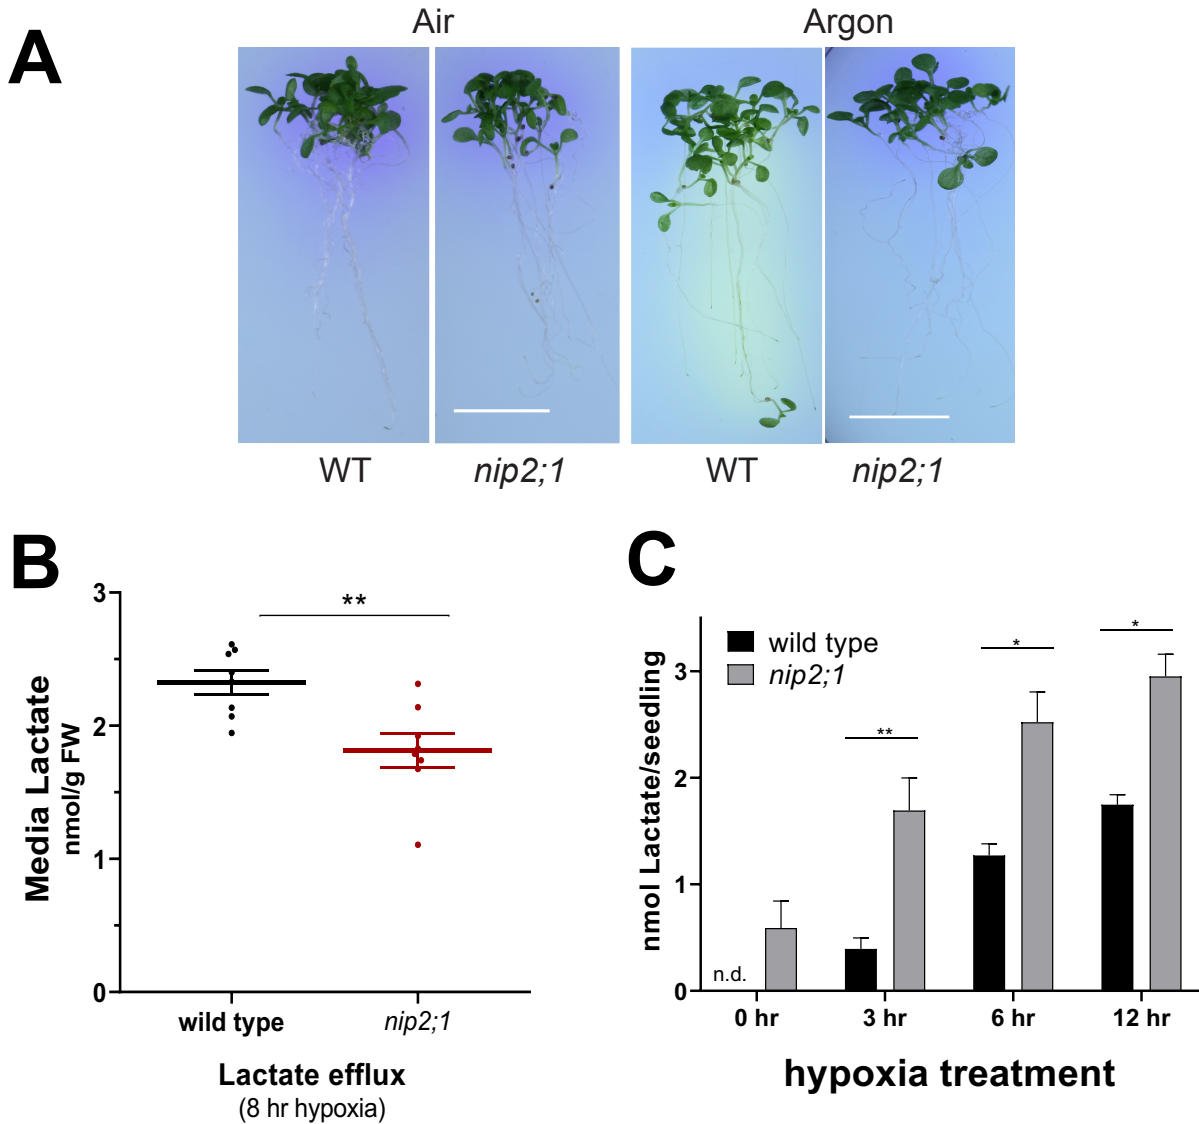

**Figure 6 Media acidification and lactic acid efflux in hypoxia-challenged *nip2;1* and wild type plants.** **A.** Ten day-old *nip2;1* and wild-type (WT) seedlings were transferred to pH indicator plates containing bromocresol purple, and were subjected to 8 h treatment of hypoxia induced by argon gas (**Argon**). **Air** indicates a normoxic control. A color change from purple to yellow indicates a decrease in the pH of the environment. Scale bar = 1 cm. **B.** 10-d-old *nip2;1* and wild-type seedlings were submerged in water and subjected to argon gas treatment for 8 hr and the lactate concentration in the media was measured. Data are represented as a scatter plot of eight biological replicates with the horizontal line representing the mean and error bars showing the SE. **C.** Accumulation of lactate in seedlings based on enzymatic analysis during hypoxia induced by bubbling nitrogen gas. Values are the average of three biological replicates at each timepoint, with the error bars showing the SEM. Asterisks indicate statistically significant differences based on a paired Student's t-test analysis (panel B) or One way ANOVA analysis (panel C).

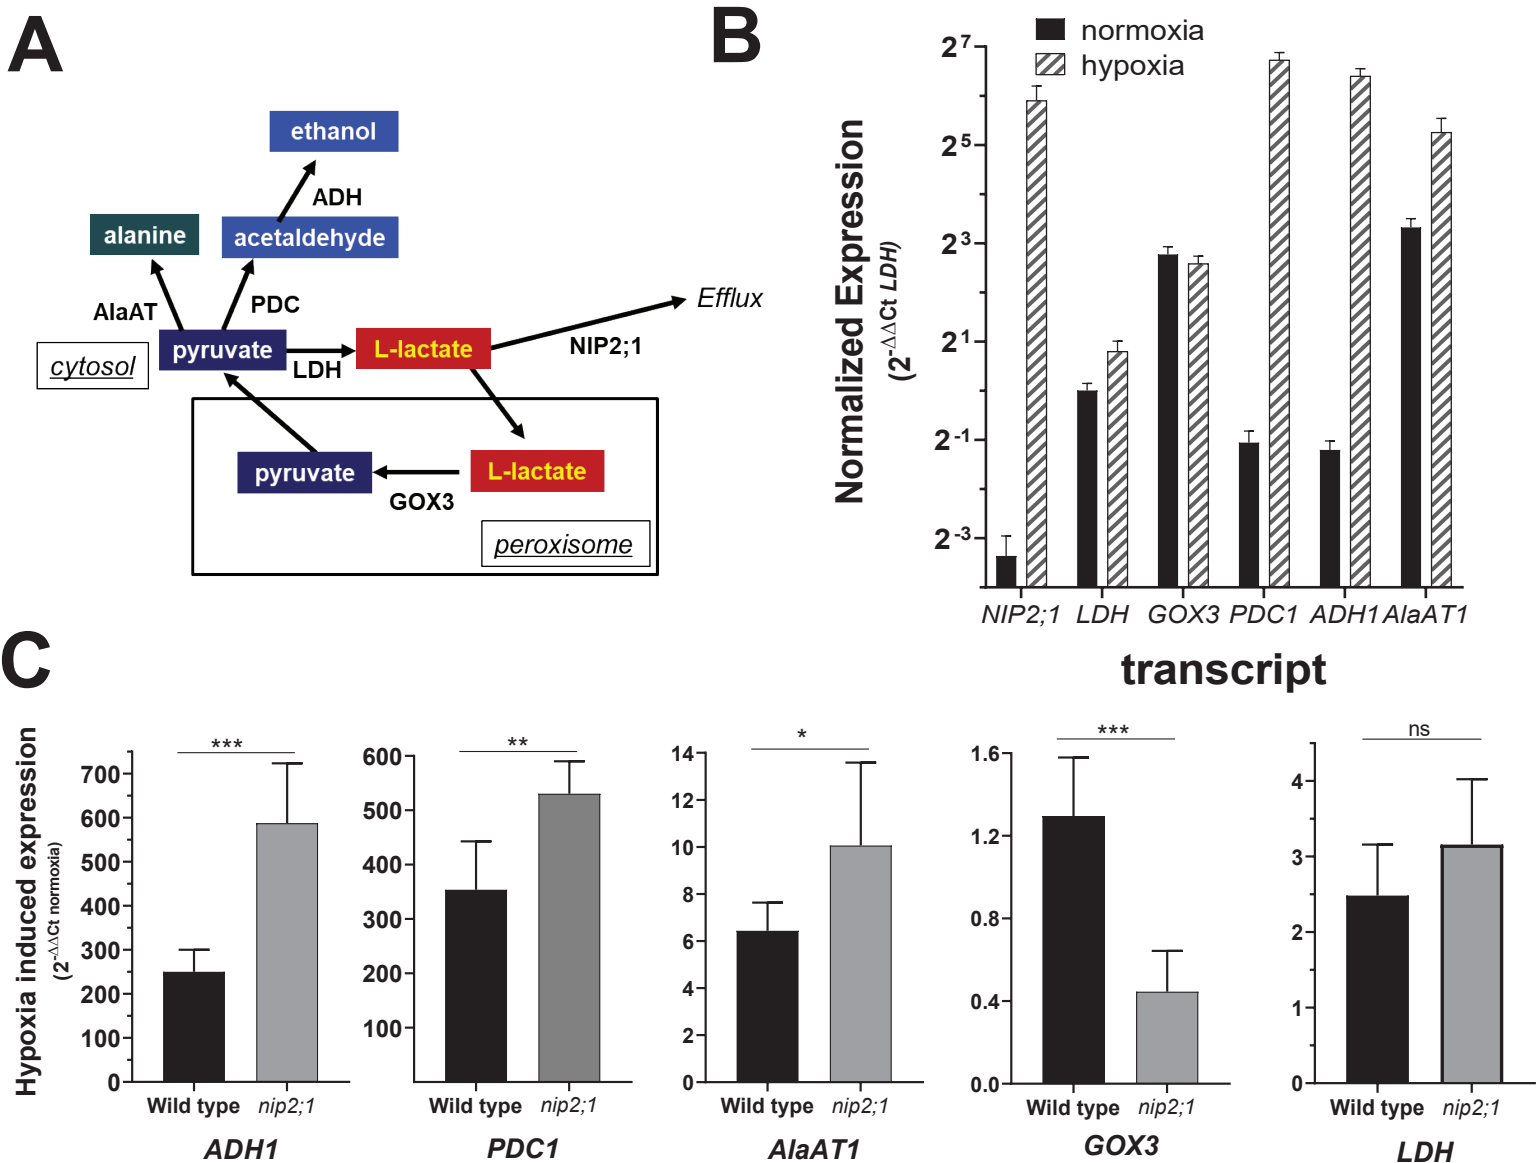

**Figure 7 Effect of *nip2;1* mutation on transcripts of pyruvate metabolism enzymes.** **A.** Scheme showing the principal pathways of pyruvate and lactate metabolism during fermentation. **B.** Q-PCR analysis of the indicated transcripts in the roots of seven day old wild-type seedlings grown under normoxic conditions (black bars) or in response to 4 hr of argon-induced hypoxia (stippled bars). The data are normalized to the transcript levels of LDH under normoxic conditions (normalized expression =  $2^{-\Delta\Delta C_t-LDH}$ ). Data are the average of nine replicates with the error bars showing the SD. **C.** Comparison of the hypoxia-induced changes of selected transcripts from the roots of wild type and *nip2;1* seedlings. The data were normalized to the expression levels of the indicated transcript under normoxic conditions. Data are the average of six determinations from three biological replicates with the error bars showing the SD. Asterisks indicate statistically significant differences based on an unpaired Student's t-test analysis.

## Parsed Citations

**Armstrong W, Beckett PM, Colmer TD, Setter TL, Greenway H (2019) Tolerance of roots to low oxygen: 'Anoxic' cores, the phytoglobin-nitric oxide cycle, and energy or oxygen sensing. *Journal of Plant Physiology* 239: 92-108**

Pubmed: [Author and Title](#)

Google Scholar: [Author Only](#) [Title Only](#) [Author and Title](#)

**Armstrong W, Strange ME, Cringle S, Beckett PM (1994) Microelectrode and Modeling Study of Oxygen Distribution in Roots. *Annals of Botany* 74: 287-299**

Pubmed: [Author and Title](#)

Google Scholar: [Author Only](#) [Title Only](#) [Author and Title](#)

**Bergmeyer HU, Bernt E (1974) Colorimetric Assay with L-Lactate, NAD Phenazine Methosulphate and INT. In HU Bergmeyer, ed, *Methods of Enzymatic Analysis (Second Edition)*. Academic Press, pp 579-582**

Pubmed: [Author and Title](#)

Google Scholar: [Author Only](#) [Title Only](#) [Author and Title](#)

**Bienert GP, Desguin B, Chaumont F, Hols P (2013) Channel-mediated lactic acid transport: a novel function for aquaglyceroporins in bacteria. *Biochem J* 454: 559-570**

Pubmed: [Author and Title](#)

Google Scholar: [Author Only](#) [Title Only](#) [Author and Title](#)

**Boursiac Y, Prak S, Boudet J, Postaire O, Luu DT, Tournaire-Roux C, Santoni V, Maurel C (2008) The response of Arabidopsis root water transport to a challenging environment implicates reactive oxygen species- and phosphorylation-dependent internalization of aquaporins. *Plant Signal Behav* 3: 1096-1098**

Pubmed: [Author and Title](#)

Google Scholar: [Author Only](#) [Title Only](#) [Author and Title](#)

**Branco-Price C, Kaiser KA, Jang CJ, Larive CK, Bailey-Serres J (2008) Selective mRNA translation coordinates energetic and metabolic adjustments to cellular oxygen deprivation and reoxygenation in Arabidopsis thaliana. *Plant J* 56: 743-755**

Pubmed: [Author and Title](#)

Google Scholar: [Author Only](#) [Title Only](#) [Author and Title](#)

**Branco-Price C, Kawaguchi R, Ferreira RB, Bailey-Serres J (2005) Genome-wide analysis of transcript abundance and translation in Arabidopsis seedlings subjected to oxygen deprivation. *Ann Bot* 96: 647-660**

Pubmed: [Author and Title](#)

Google Scholar: [Author Only](#) [Title Only](#) [Author and Title](#)

**Chevalier AS, Chaumont F (2015) Trafficking of plant plasma membrane aquaporins: multiple regulation levels and complex sorting signals. *Plant Cell Physiol* 56: 819-829**

Pubmed: [Author and Title](#)

Google Scholar: [Author Only](#) [Title Only](#) [Author and Title](#)

**Choi WG, Roberts DM (2007) Arabidopsis NIP2;1, a major intrinsic protein transporter of lactic acid induced by anoxic stress. *J Biol Chem* 282: 24209-24218**

Pubmed: [Author and Title](#)

Google Scholar: [Author Only](#) [Title Only](#) [Author and Title](#)

**Clough SJ, Bent AF (1998) Floral dip: a simplified method for Agrobacterium-mediated transformation of Arabidopsis thaliana. *Plant J* 16: 735-743**

Pubmed: [Author and Title](#)

Google Scholar: [Author Only](#) [Title Only](#) [Author and Title](#)

**Collard F, Baldin F, Gerin I, Bolsee J, Noel G, Graff J, Veiga-da-Cunha M, Stroobant V, Vertommen D, Houddane A, Rider MH, Linster CL, Van Schaftingen E, Bommer GT (2016) A conserved phosphatase destroys toxic glycolytic side products in mammals and yeast. *Nat Chem Biol* 12: 601-607**

Pubmed: [Author and Title](#)

Google Scholar: [Author Only](#) [Title Only](#) [Author and Title](#)

**Counillon L, Bouret Y, Marchiq I, Pouyssegur J (2016) Na<sup>+</sup>/H<sup>+</sup> antiporter (NHE1) and lactate/H<sup>+</sup> symporters (MCTs) in pH homeostasis and cancer metabolism. *Biochimica Et Biophysica Acta-Molecular Cell Research* 1863: 2465-2480**

Pubmed: [Author and Title](#)

Google Scholar: [Author Only](#) [Title Only](#) [Author and Title](#)

**Davies DD, Grego S, Kenworthy P (1974) The control of the production of lactate and ethanol by higher plants. *Planta* 118: 297-310**

Pubmed: [Author and Title](#)

Google Scholar: [Author Only](#) [Title Only](#) [Author and Title](#)

**Dolferus R, Wolansky M, Carroll R, Miyashita Y, Ismond K, Good A (2008) Functional analysis of lactate dehydrogenase during hypoxic stress in Arabidopsis. *Functional Plant Biology* 35: 131-140**

Pubmed: [Author and Title](#)

Google Scholar: [Author Only](#) [Title Only](#) [Author and Title](#)

**Drew MC (1997) OXYGEN DEFICIENCY AND ROOT METABOLISM: Injury and Acclimation Under Hypoxia and Anoxia. *Annu Rev Plant***

**Physiol Plant Mol Biol 48: 223-250**

Pubmed: [Author and Title](#)

Google Scholar: [Author Only Title Only Author and Title](#)

**Ellis MH, Dennis ES, Peacock WJ (1999) Arabidopsis roots and shoots have different mechanisms for hypoxic stress tolerance. Plant Physiol 119: 57-64**

Pubmed: [Author and Title](#)

Google Scholar: [Author Only Title Only Author and Title](#)

**Engqvist MK, Schmitz J, Gertzmann A, Florian A, Jaspert N, Arif M, Balazadeh S, Mueller-Roeber B, Fernie AR, Maurino VG (2015) GLYCOLATE OXIDASE3, a Glycolate Oxidase Homolog of Yeast I-Lactate Cytochrome c Oxidoreductase, Supports I-Lactate Oxidation in Roots of Arabidopsis. Plant Physiol 169: 1042-1061**

Pubmed: [Author and Title](#)

Google Scholar: [Author Only Title Only Author and Title](#)

**Faghiri Z, Camargo SM, Huggel K, Forster IC, Ndegwa D, Verrey F, Skelly PJ (2010) The tegument of the human parasitic worm Schistosoma mansoni as an excretory organ: the surface aquaporin SmAQP is a lactate transporter. PLoS One 5: e10451**

Pubmed: [Author and Title](#)

Google Scholar: [Author Only Title Only Author and Title](#)

**Felle HH (2005) pH regulation in anoxic plants. Annals of Botany 96: 519-532**

Pubmed: [Author and Title](#)

Google Scholar: [Author Only Title Only Author and Title](#)

**Gibbs J, Greenway H (2003) Mechanisms of anoxia tolerance in plants. I. Growth, survival and anaerobic catabolism (vol 30, pg 1, 1993). Functional Plant Biology 30: 353-U356**

Pubmed: [Author and Title](#)

Google Scholar: [Author Only Title Only Author and Title](#)

**Giuntoli B, Lee SC, Licausi F, Kosmacz M, Oosumi T, van Dongen JT, Bailey-Serres J, Perata P (2014) A trihelix DNA binding protein counterbalances hypoxia-responsive transcriptional activation in Arabidopsis. PLoS Biol 12: e1001950**

Pubmed: [Author and Title](#)

Google Scholar: [Author Only Title Only Author and Title](#)

**Greenway H, Gibbs J (2003) Mechanisms of anoxia tolerance in plants. II. Energy requirements for maintenance and energy distribution to essential processes. Functional Plant Biology 30: 999-1036**

Pubmed: [Author and Title](#)

Google Scholar: [Author Only Title Only Author and Title](#)

**Guenther JF, Chanmanivone N, Galetovic MP, Wallace IS, Cobb JA, Roberts DM (2003) Phosphorylation of soybean nodulin 26 on serine 262 enhances water permeability and is regulated developmentally and by osmotic signals. The Plant cell 15: 981-991**

Pubmed: [Author and Title](#)

Google Scholar: [Author Only Title Only Author and Title](#)

**Ishikawa F, Suga S, Uemura T, Sato MH, Maeshima M (2005) Novel type aquaporin SIPs are mainly localized to the ER membrane and show cell-specific expression in Arabidopsis thaliana. FEBS Lett 579: 5814-5820**

Pubmed: [Author and Title](#)

Google Scholar: [Author Only Title Only Author and Title](#)

**Ismond KP, Dolferus R, De Pauw M, Dennis ES, Good AG (2003) Enhanced low oxygen survival in Arabidopsis through increased metabolic flux in the fermentative pathway. Plant Physiology 132: 1292-1302**

Pubmed: [Author and Title](#)

Google Scholar: [Author Only Title Only Author and Title](#)

**Johanson U, Karlsson M, Johansson I, Gustavsson S, Sjovald S, Frayse L, Weig AR, Kjellbom P (2001) The complete set of genes encoding major intrinsic proteins in Arabidopsis provides a framework for a new nomenclature for major intrinsic proteins in plants. Plant Physiol 126: 1358-1369**

Pubmed: [Author and Title](#)

Google Scholar: [Author Only Title Only Author and Title](#)

**Kamiya T, Fujiwara T (2009) Arabidopsis NIP1;1 transports antimonite and determines antimonite sensitivity. Plant Cell Physiol 50: 1977-1981**

Pubmed: [Author and Title](#)

Google Scholar: [Author Only Title Only Author and Title](#)

**Kamiya T, Tanaka M, Mitani N, Ma JF, Maeshima M, Fujiwara T (2009) NIP1;1, an aquaporin homolog, determines the arsenite sensitivity of Arabidopsis thaliana. J Biol Chem 284: 2114-2120**

Pubmed: [Author and Title](#)

Google Scholar: [Author Only Title Only Author and Title](#)

**Koncz C, Schell J (1986) The promoter of TL-DNA gene 5 controls the tissue-specific expression of chimaeric genes carried by a novel type of Agrobacterium binary vector. Molecular and General Genetics MGG 204: 383-396**

Pubmed: [Author and Title](#)

Google Scholar: [Author Only Title Only Author and Title](#)

**Kursteiner O, Dupuis I, Kuhlemeier C (2003) The pyruvate decarboxylase1 gene of Arabidopsis is required during anoxia but not other environmental stresses. Plant Physiol 132: 968-978**

Pubmed: [Author and Title](#)

Google Scholar: [Author Only Title Only Author and Title](#)

**Laemmli UK (1970) Cleavage of structural proteins during the assembly of the head of bacteriophage T4. Nature 227: 680-685**

Pubmed: [Author and Title](#)

Google Scholar: [Author Only Title Only Author and Title](#)

**Latham T, Mackay L, Sproul D, Karim M, Culley J, Harrison DJ, Hayward L, Langridge-Smith P, Gilbert N, Ramsahoye BH (2012) Lactate, a product of glycolytic metabolism, inhibits histone deacetylase activity and promotes changes in gene expression. Nucleic Acids Research 40: 4794-4803**

Pubmed: [Author and Title](#)

Google Scholar: [Author Only Title Only Author and Title](#)

**Lee SC, Mustruph A, Sasidharan R, Vashisht D, Pedersen O, Oosumi T, Voeselek LA, Bailey-Serres J (2011) Molecular characterization of the submergence response of the Arabidopsis thaliana ecotype Columbia. The New phytologist 190: 457-471**

Pubmed: [Author and Title](#)

Google Scholar: [Author Only Title Only Author and Title](#)

**Li X, Wang X, Yang Y, Li R, He Q, Fang X, Luu DT, Maurel C, Lin J (2011) Single-molecule analysis of PIP2;1 dynamics and partitioning reveals multiple modes of Arabidopsis plasma membrane aquaporin regulation. Plant Cell 23: 3780-3797**

Pubmed: [Author and Title](#)

Google Scholar: [Author Only Title Only Author and Title](#)

**Licausi F, van Dongen JT, Giuntoli B, Novi G, Santaniello A, Geigenberger P, Perata P (2010) HRE1 and HRE2, two hypoxia-inducible ethylene response factors, affect anaerobic responses in Arabidopsis thaliana. Plant J 62: 302-315**

Pubmed: [Author and Title](#)

Google Scholar: [Author Only Title Only Author and Title](#)

**Liu F, Vantoi T, Moy LP, Bock G, Linford LD, Quackenbush J (2005) Global transcription profiling reveals comprehensive insights into hypoxic response in Arabidopsis. Plant Physiol 137: 1115-1129**

Pubmed: [Author and Title](#)

Google Scholar: [Author Only Title Only Author and Title](#)

**Lokdarshi A, Conner WC, McClintock C, Li T, Roberts DM (2016) Arabidopsis CML38, a Calcium Sensor That Localizes to Ribonucleoprotein Complexes under Hypoxia Stress. Plant Physiol 170: 1046-1059**

Pubmed: [Author and Title](#)

Google Scholar: [Author Only Title Only Author and Title](#)

**Marbach EP, Weil MH (1967) Rapid enzymatic measurement of blood lactate and pyruvate. Use and significance of metaphosphoric acid as a common precipitant. Clin Chem 13: 314-325**

Pubmed: [Author and Title](#)

Google Scholar: [Author Only Title Only Author and Title](#)

**Mateluna P, Salvatierra A, Solis S, Nunez G, Pimentel P (2018) Involvement of aquaporin NIP1;1 in the contrasting tolerance response to root hypoxia in Prunus rootstocks. J Plant Physiol 228: 19-28**

Pubmed: [Author and Title](#)

Google Scholar: [Author Only Title Only Author and Title](#)

**Maurino VG, Engqvist MK (2015) 2-Hydroxy Acids in Plant Metabolism. Arabidopsis Book 13: e0182**

Pubmed: [Author and Title](#)

Google Scholar: [Author Only Title Only Author and Title](#)

**Mizutani M, Watanabe S, Nakagawa T, Maeshima M (2006) Aquaporin NIP2;1 is mainly localized to the ER membrane and shows root-specific accumulation in Arabidopsis thaliana. Plant and Cell Physiology 47: 1420-1426**

Pubmed: [Author and Title](#)

Google Scholar: [Author Only Title Only Author and Title](#)

**Murchie EH, Lawson T (2013) Chlorophyll fluorescence analysis: a guide to good practice and understanding some new applications. J Exp Bot 64: 3983-3998**

Pubmed: [Author and Title](#)

Google Scholar: [Author Only Title Only Author and Title](#)

**Mustruph A, Barding GA, Jr., Kaiser KA, Larive CK, Bailey-Serres J (2014) Characterization of distinct root and shoot responses to low-oxygen stress in Arabidopsis with a focus on primary C- and N-metabolism. Plant Cell Environ 37: 2366-2380**

Pubmed: [Author and Title](#)

Google Scholar: [Author Only Title Only Author and Title](#)

**Mustruph A, Lee SC, Oosumi T, Zanetti ME, Yang HJ, Ma K, Yaghoubi-Masihi A, Fukao T, Bailey-Serres J (2010) Cross-Kingdom Comparison of Transcriptomic Adjustments to Low-Oxygen Stress Highlights Conserved and Plant-Specific Responses. Plant Physiology 152: 1484-1500**

Pubmed: [Author and Title](#)

Google Scholar: [Author Only Title Only Author and Title](#)

**Mustroph A, Zanetti ME, Jang CJ, Holtan HE, Repetti PP, Galbraith DW, Girke T, Bailey-Serres J (2009) Profiling translomes of discrete cell populations resolves altered cellular priorities during hypoxia in Arabidopsis. Proc Natl Acad Sci U S A 106: 18843-18848**

Pubmed: [Author and Title](#)

Google Scholar: [Author Only](#) [Title Only](#) [Author and Title](#)

**Niyikiza D, Piya S, Routray P, Miao L, Kim WS, Burch-Smith T, Gill T, Sams C, Arelli PR, Pantalone V, Krishnan HB, Hewezi T (2020) Interactions of gene expression, alternative splicing, and DNA methylation in determining nodule identity. Plant J**

Pubmed: [Author and Title](#)

Google Scholar: [Author Only](#) [Title Only](#) [Author and Title](#)

**Noda Y, Sasaki S (2006) Regulation of aquaporin-2 trafficking and its binding protein complex. Biochim Biophys Acta 1758: 1117-1125**

Pubmed: [Author and Title](#)

Google Scholar: [Author Only](#) [Title Only](#) [Author and Title](#)

**Pfaffl MW (2001) A new mathematical model for relative quantification in real-time RT-PCR. Nucleic Acids Res 29: e45**

Pubmed: [Author and Title](#)

Google Scholar: [Author Only](#) [Title Only](#) [Author and Title](#)

**Pommerrenig B, Diehn TA, Bernhardt N, Bienert MD, Mitani-Ueno N, Fuge J, Bieber A, Spitzer C, Brautigam A, Ma JF, Chaumont F, Bienert GP (2020) Functional evolution of nodulin 26-like intrinsic proteins: from bacterial arsenic detoxification to plant nutrient transport. New Phytol 225: 1383-1396**

Pubmed: [Author and Title](#)

Google Scholar: [Author Only](#) [Title Only](#) [Author and Title](#)

**Prak S, Hem S, Boudet J, Viennois G, Sommerer N, Rossignol M, Maurel C, Santoni V (2008) Multiple phosphorylations in the C-terminal tail of plant plasma membrane aquaporins: role in subcellular trafficking of AtPIP2;1 in response to salt stress. Mol Cell Proteomics 7: 1019-1030**

Pubmed: [Author and Title](#)

Google Scholar: [Author Only](#) [Title Only](#) [Author and Title](#)

**Ricoult C, Cliquet J-B, Limani AM (2005) Stimulation of alanine amino transferase (AlaAT) gene expression and alanine accumulation in embryo axis of the model legume Medicago truncatula contribute to anoxia stress tolerance. Physiologia Plantarum 123: 30-39**

Pubmed: [Author and Title](#)

Google Scholar: [Author Only](#) [Title Only](#) [Author and Title](#)

**Rivoal J, Hanson AD (1993) Evidence for a Large and Sustained Glycolytic Flux to Lactate in Anoxic Roots of Some Members of the Halophytic Genus Limonium. Plant Physiol 101: 553-560**

Pubmed: [Author and Title](#)

Google Scholar: [Author Only](#) [Title Only](#) [Author and Title](#)

**Roberts DM, Routray P (2017) The Nodulin26 Intrinsic Protein Subfamily. In F Chaumont, SD Tyerman, eds, Plant Aquaporins From Transport to Signaling. Springer International Publishing, pp 267-296**

Pubmed: [Author and Title](#)

Google Scholar: [Author Only](#) [Title Only](#) [Author and Title](#)

**Roberts JK, Callis J, Jardetzky O, Walbot V, Freeling M (1984) Cytoplasmic acidosis as a determinant of flooding intolerance in plants. Proc Natl Acad Sci U S A 81: 6029-6033**

Pubmed: [Author and Title](#)

Google Scholar: [Author Only](#) [Title Only](#) [Author and Title](#)

**Santoni V (2017) Plant Aquaporin Postranslational Regulation. In F Chaumont, SD Tyerman, eds, Plant Aquaporins From Transport to Signaling. Springer International Publishing, pp 83-105**

Pubmed: [Author and Title](#)

Google Scholar: [Author Only](#) [Title Only](#) [Author and Title](#)

**Sato T, Harada T, Ishizawa K (2002) Stimulation of glycolysis in anaerobic elongation of pondweed (Potamogeton distinctus) turions. J Exp Bot 53: 1847-1856**

Pubmed: [Author and Title](#)

Google Scholar: [Author Only](#) [Title Only](#) [Author and Title](#)

**Schneider CA, Rasband WS, Eliceiri KW (2012) NIH Image to ImageJ: 25 years of image analysis. Nat Methods 9: 671-675**

Pubmed: [Author and Title](#)

Google Scholar: [Author Only](#) [Title Only](#) [Author and Title](#)

**Silva AL, Dressano K, Ceciliato PHO, Guerrero-Abad JC, Moura DS (2018) Evaluation of Root pH Change Through Gel Containing pH-sensitive Indicator Bromocresol Purple. Bio-Protocol 8(7):e2796**

Pubmed: [Author and Title](#)

Google Scholar: [Author Only](#) [Title Only](#) [Author and Title](#)

**Sorenson R, Bailey-Serres J (2014) Selective mRNA sequestration by OLIGOURIDYLATE-BINDING PROTEIN 1 contributes to translational control during hypoxia in Arabidopsis. Proc Natl Acad Sci U S A 111: 2373-2378**

Pubmed: [Author and Title](#)

Google Scholar: [Author Only](#) [Title Only](#) [Author and Title](#)

**Sun SR, Li H, Chen JH, Qian Q (2017) Lactic Acid: No Longer an Inert and End-Product of Glycolysis. Physiology 32: 453-463**

- Pubmed: [Author and Title](#)  
Google Scholar: [Author Only Title Only Author and Title](#)
- Takano J, Miwa K, Fujiwara T (2008) Boron transport mechanisms: collaboration of channels and transporters. Trends Plant Sci 13: 451-457**  
Pubmed: [Author and Title](#)  
Google Scholar: [Author Only Title Only Author and Title](#)
- Takano J, Yoshinari A, Luu D-T (2017) Plant Aquaporin Trafficking. In F Chaumont, SD Tyerman, eds, Plant Aquaporins From Transport to Signaling. Springer International Publishing, pp 47-81**  
Pubmed: [Author and Title](#)  
Google Scholar: [Author Only Title Only Author and Title](#)
- Tsai KJ, Chou SJ, Shih MC (2014) Ethylene plays an essential role in the recovery of Arabidopsis during post-anaerobiosis reoxygenation. Plant Cell Environ 37: 2391-2405**  
Pubmed: [Author and Title](#)  
Google Scholar: [Author Only Title Only Author and Title](#)
- Vialaret J, Di Pietro M, Hem S, Maurel C, Rossignol M, Santoni V (2014) Phosphorylation dynamics of membrane proteins from Arabidopsis roots submitted to salt stress. Proteomics 14: 1058-1070**  
Pubmed: [Author and Title](#)  
Google Scholar: [Author Only Title Only Author and Title](#)
- Voesenek LA, Bailey-Serres J (2013) Flooding tolerance: O<sub>2</sub> sensing and survival strategies. Curr Opin Plant Biol 16: 647-653**  
Pubmed: [Author and Title](#)  
Google Scholar: [Author Only Title Only Author and Title](#)
- Voesenek LA, Bailey-Serres J (2015) Flood adaptive traits and processes: an overview. New Phytol 206: 57-73**  
Pubmed: [Author and Title](#)  
Google Scholar: [Author Only Title Only Author and Title](#)
- Wallace IS, Choi WG, Roberts DM (2006) The structure, function and regulation of the nodulin 26-like intrinsic protein family of plant aquaglyceroporins. Biochim Biophys Acta 1758: 1165-1175**  
Pubmed: [Author and Title](#)  
Google Scholar: [Author Only Title Only Author and Title](#)
- Wang S, Yoshinari A, Shimada T, Hara-Nishimura I, Mitani-Ueno N, Feng Ma J, Naito S, Takano J (2017) Polar Localization of the NIP5;1 Boric Acid Channel Is Maintained by Endocytosis and Facilitates Boron Transport in Arabidopsis Roots. Plant Cell 29: 824-842**  
Pubmed: [Author and Title](#)  
Google Scholar: [Author Only Title Only Author and Title](#)
- Wang X, Fan C, Zhang X, Zhu J, Fu YF (2013) BioVector, a flexible system for gene specific-expression in plants. BMC Plant Biol 13: 198**  
Pubmed: [Author and Title](#)  
Google Scholar: [Author Only Title Only Author and Title](#)
- Weaver CD, Crombie B, Stacey G, Roberts DM (1991) Calcium-dependent phosphorylation of symbiosome membrane proteins from nitrogen-fixing soybean nodules : evidence for phosphorylation of nodulin-26. Plant Physiol 95: 222-227**  
Pubmed: [Author and Title](#)  
Google Scholar: [Author Only Title Only Author and Title](#)
- Woody ST, Austin-Phillips S, Amasino RM, Krysan PJ (2007) The WiscDsLox T-DNA collection: an arabidopsis community resource generated by using an improved high-throughput T-DNA sequencing pipeline. J Plant Res 120: 157-165**  
Pubmed: [Author and Title](#)  
Google Scholar: [Author Only Title Only Author and Title](#)
- Xia JH, Roberts J (1994) Improved Cytoplasmic pH Regulation, Increased Lactate Efflux, and Reduced Cytoplasmic Lactate Levels Are Biochemical Traits Expressed in Root Tips of Whole Maize Seedlings Acclimated to a Low-Oxygen Environment. Plant Physiol 105: 651-657**  
Pubmed: [Author and Title](#)  
Google Scholar: [Author Only Title Only Author and Title](#)
- Xia JH, Saglio PH (1992) Lactic Acid efflux as a mechanism of hypoxic acclimation of maize root tips to anoxia. Plant Physiol 100: 40-46**  
Pubmed: [Author and Title](#)  
Google Scholar: [Author Only Title Only Author and Title](#)
- Xu W, Dai W, Yan H, Li S, Shen H, Chen Y, Xu H, Sun Y, He Z, Ma M (2015) Arabidopsis NIP3;1 Plays an Important Role in Arsenic Uptake and Root-to-Shoot Translocation under Arsenite Stress Conditions. Mol Plant 8: 722-733**  
Pubmed: [Author and Title](#)  
Google Scholar: [Author Only Title Only Author and Title](#)
- Yeung E, Bailey-Serres J, Sasidharan R (2019) After The Deluge: Plant Revival Post-Flooding. Trends Plant Sci 24: 443-454**  
Pubmed: [Author and Title](#)  
Google Scholar: [Author Only Title Only Author and Title](#)
- Zhang D, Tang Z, Huang H, Zhou G, Cui C, Weng Y, Liu W, Kim S, Lee S, Perez-Neut M, Ding J, Czyn D, Hu R, Ye Z, He M, Zheng YG,**

Shuman HA, Dai L, Ren B, Roeder RG, Becker L, Zhao Y (2019) Metabolic regulation of gene expression by histone lactylation. *Nature* 574: 575-580

Pubmed: [Author and Title](#)

Google Scholar: [Author Only](#) [Title Only](#) [Author and Title](#)
